# Supplementary material for: Structure of tick-borne encephalitis virus and its neutralization by a monoclonal antibody
Source: PubMed Central journal article supplement (PMC5789857; doi:10.1038/s41467-018-02882-0), 2018-01-30
Supplement: 41467_2018_2882_MOESM1_ESM.pdf [file 41467_2018_2882_MOESM1_ESM.pdf]

## **Supplementary information**

### **Structure of tick-borne encephalitis virus and its neutralization by a monoclonal antibody**

**Füzik et al.**

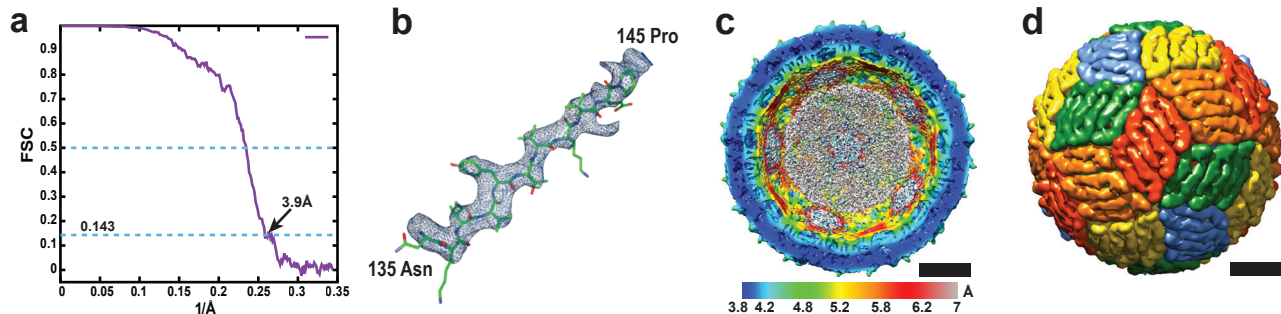

**Supplementary Figure 1. Cryo-EM reconstruction of TBEV virion.** (a) Fourier shell correlation curve of final reconstruction of TBEV virion calculated according to “gold standard”. (b) Example electron density map of E-protein with corresponding structure. (c) Local resolution of cryo-EM map of TBEV virion. The display shows a cut-away half map colored according to the local resolution. The best resolved rigid parts include the ectodomains of the E-proteins. In contrast the virus membrane was reconstructed with less detail. Parts of the map with resolution worse than 7 Å are shown in grey. The non-sharpened electron density map was used for the display. (d) Molecular surface of TBEV virion low-pass filtered to 20 Å to show “Herringbone” organization of envelope proteins. Three dimers of E-proteins form a “raft” that is characteristic for flaviviruses. Scale bars in (c) and (d) represent 10 nm.

## E-protein A - A2 interfaces

| Hydrogen bonds |                   |           |                 |    | Salt bridges      |           |                 |    |             |           |             |
|----------------|-------------------|-----------|-----------------|----|-------------------|-----------|-----------------|----|-------------|-----------|-------------|
| ##             | Structure 1       | Dist. [Å] | Structure 2     | ## | Structure 1       | Dist. [Å] | Structure 2     | ## | Structure 1 | Dist. [Å] | Structure 2 |
| 1              | A2:GLU 387[ OE1 ] | 3.57      | A:LYS 309[ NZ ] | 1  | A2:GLU 387[ OE1 ] | 3.57      | A:LYS 309[ NZ ] |    |             |           |             |

Interface area: 420 Å<sup>2</sup>

**Interfacing residues**

■ Inaccessible residues  
■ Solvent-accessible residues  
■ HSDC Residues making Hydrogen/Disulphide bond, Salt bridge or Covalent link  
■ Interfacing residues  
■ ASA Accessible Surface Area, Å<sup>2</sup> ■ BSA Buried Surface Area, Å<sup>2</sup> ■ ΔG Solvation energy effect, kcal/mol ■ Buried area percentage, one bar per 10%

| ##  | Structure 1 | HSDC | ASA    | BSA   | ΔG    | ##  | Structure 2 | HSDC | ASA    | BSA   | ΔG    |
|-----|-------------|------|--------|-------|-------|-----|-------------|------|--------|-------|-------|
| 310 | A2:THR 310  |      | 92.39  | 13.41 | 0.03  | 16  | A:GLU 16    |      | 144.39 | 11.95 | 0.15  |
| 311 | A2:LYS 311  |      | 99.90  | 0.75  | 0.01  | 302 | A:LEU 302   |      | 100.55 | 50.75 | 0.43  |
| 312 | A2:PHE 312  |      | 6.25   | 4.41  | -0.05 | 303 | A:THR 303   |      | 134.11 | 44.75 | 0.36  |
| 313 | A2:THR 313  |      | 81.35  | 65.64 | 0.99  | 304 | A:TYR 304   |      | 57.44  | 3.33  | -0.02 |
| 314 | A2:TRP 314  |      | 63.31  | 60.74 | 0.20  | 305 | A:THR 305   |      | 96.64  | 26.15 | 0.42  |
| 315 | A2:LYS 315  |      | 134.73 | 12.48 | 0.05  | 306 | A:MET 306   |      | 98.65  | 46.64 | 0.69  |
| 317 | A2:ALA 317  |      | 60.75  | 23.29 | 0.35  | 309 | A:LYS 309   | HS   | 114.39 | 30.84 | -1.05 |
| 319 | A2:THR 319  |      | 68.29  | 1.47  | -0.02 | 339 | A:ARG 339   |      | 67.64  | 50.60 | -1.12 |
| 333 | A2:SER 333  |      | 86.20  | 1.73  | -0.01 | 349 | A:SER 349   |      | 116.52 | 10.80 | -0.12 |
| 347 | A2:HIS 347  |      | 106.13 | 59.61 | 0.46  | 350 | A:PRO 350   |      | 40.31  | 6.12  | -0.05 |
| 348 | A2:GLY 348  |      | 62.96  | 12.87 | 0.18  | 351 | A:ASP 351   |      | 144.98 | 31.67 | 0.05  |
| 349 | A2:SER 349  |      | 116.52 | 44.25 | 0.43  | 352 | A:VAL 352   |      | 93.60  | 56.65 | 0.91  |
| 350 | A2:PRO 350  |      | 40.31  | 9.02  | 0.14  | 353 | A:ASN 353   |      | 78.79  | 38.18 | -0.07 |
| 387 | A2:GLU 387  | HS   | 116.75 | 34.98 | 0.03  |     |             |      |        |       |       |
| 388 | A2:LEU 388  |      | 40.33  | 38.58 | 0.62  |     |             |      |        |       |       |
| 389 | A2:SER 389  |      | 54.64  | 3.40  | -0.04 |     |             |      |        |       |       |
| 390 | A2:HIS 390  |      | 62.88  | 6.38  | -0.03 |     |             |      |        |       |       |
| 391 | A2:GLN 391  |      | 121.61 | 24.42 | -0.27 |     |             |      |        |       |       |
| 395 | A2:LYS 395  |      | 139.92 | 10.30 | -0.08 |     |             |      |        |       |       |

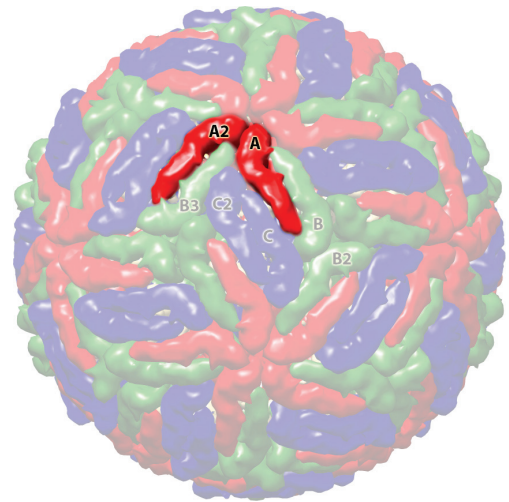

## E-protein B - B2 interfaces

| Hydrogen bonds |                   |           |                 |  |
|----------------|-------------------|-----------|-----------------|--|
| ##             | Structure 1       | Dist. [Å] | Structure 2     |  |
| 1              | B2:SER 168[ N ]   | 2.93      | B:ASP 351[ O ]  |  |
| 2              | B2:ASN 135[ OD1 ] | 2.07      | B:ASP 351[ N ]  |  |
| 3              | B2:GLU 295[ OE2 ] | 3.79      | B:GLN 16[ NE2 ] |  |

Interface area: 410 Å<sup>2</sup>

**Interfacing residues**

■ Inaccessible residues  
■ Solvent-accessible residues  
■ HSDC Residues making Hydrogen/Disulphide bond, Salt bridge or Covalent link  
■ Interfacing residues  
■ ASA Accessible Surface Area, Å<sup>2</sup> ■ BSA Buried Surface Area, Å<sup>2</sup> ■ ΔG Solvation energy effect, kcal/mol ■ Buried area percentage, one bar per 10%

| ##  | Structure 1 | HSDC | ASA    | BSA   | ΔG    | ##  | Structure 2 | HSDC | ASA    | BSA    | ΔG    |
|-----|-------------|------|--------|-------|-------|-----|-------------|------|--------|--------|-------|
| 19  | B2:THR 19   |      | 48.51  | 6.19  | 0.10  | 16  | B:GLN 16    | H    | 154.11 | 87.11  | -0.15 |
| 20  | B2:ARG 20   |      | 115.47 | 46.75 | -0.04 | 37  | B:GLY 37    |      | 50.45  | 4.51   | -0.04 |
| 134 | B2:ALA 134  |      | 53.07  | 1.34  | 0.02  | 38  | B:LYS 38    |      | 52.11  | 0.65   | 0.01  |
| 135 | B2:ASN 135  | H    | 105.24 | 58.71 | -0.54 | 297 | B:LEU 297   |      | 111.71 | 3.93   | -0.04 |
| 167 | B2:VAL 167  | H    | 69.50  | 56.09 | 0.57  | 298 | B:LYS 298   |      | 124.19 | 9.20   | 0.15  |
| 168 | B2:SER 168  | H    | 95.27  | 50.21 | 0.65  | 302 | B:LEU 302   |      | 103.21 | 47.31  | 0.57  |
| 170 | B2:GLU 170  |      | 86.98  | 25.78 | -0.29 | 303 | B:THR 303   |      | 134.07 | 15.90  | 0.25  |
| 172 | B2:THR 172  |      | 50.35  | 4.18  | 0.07  | 339 | B:ARG 339   |      | 69.62  | 14.99  | -0.50 |
| 173 | B2:ILE 173  |      | 107.75 | 55.78 | 0.78  | 343 | B:ARG 343   |      | 102.14 | 33.67  | 0.21  |
| 175 | B2:THR 175  |      | 93.85  | 8.52  | -0.09 | 345 | B:VAL 345   |      | 8.21   | 0.67   | 0.01  |
| 181 | B2:ASP 181  |      | 44.88  | 7.98  | -0.14 | 350 | B:PRO 350   |      | 84.30  | 22.18  | 0.34  |
| 189 | B2:ALA 189  |      | 95.69  | 11.55 | 0.18  | 351 | B:ASP 351   | H    | 144.19 | 138.85 | -0.59 |
| 295 | B2:GLU 295  | H    | 95.83  | 11.78 | -0.12 | 352 | B:VAL 352   |      | 76.68  | 29.46  | 0.47  |
| 296 | B2:LYS 296  |      | 134.29 | 24.77 | -0.42 | 353 | B:ASN 353   |      | 76.29  | 37.36  | 0.14  |

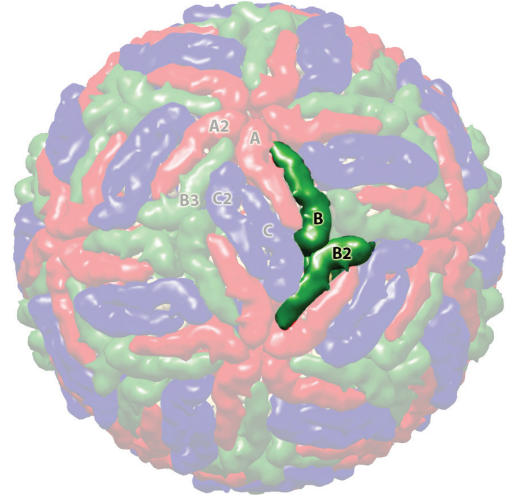

## E-protein A - B3 interfaces

Interface area: 235 Å<sup>2</sup>

**Interfacing residues**

■ Inaccessible residues  
■ Solvent-accessible residues  
■ HSDC Residues making Hydrogen/Disulphide bond, Salt bridge or Covalent link  
■ Interfacing residues  
■ ASA Accessible Surface Area, Å<sup>2</sup> ■ BSA Buried Surface Area, Å<sup>2</sup> ■ ΔG Solvation energy effect, kcal/mol ■ Buried area percentage, one bar per 10%

| ##  | Structure 1 | HSDC | ASA    | BSA   | ΔG    | ##  | Structure 2 | HSDC | ASA    | BSA   | ΔG    |
|-----|-------------|------|--------|-------|-------|-----|-------------|------|--------|-------|-------|
| 73  | B3:ARG 73   |      | 101.91 | 20.38 | -0.06 | 16  | A:GLN 16    |      | 144.39 | 44.86 | -0.39 |
| 76  | B3:THR 76   |      | 96.76  | 77.09 | 0.61  | 17  | A:GLY 17    |      | 67.94  | 20.37 | 0.18  |
| 77  | B3:MET 77   |      | 123.35 | 69.98 | 1.50  | 19  | A:THR 19    |      | 44.66  | 27.64 | 0.44  |
| 78  | B3:GLY 78   |      | 40.36  | 25.63 | 0.23  | 20  | A:ARG 20    |      | 102.77 | 4.52  | 0.07  |
| 79  | B3:PRO 79   |      | 92.16  | 6.36  | 0.10  | 38  | A:LYS 38    |      | 43.45  | 10.44 | -0.43 |
| 107 | B3:LEU 107  |      | 107.17 | 38.50 | 0.62  | 295 | A:GLU 295   |      | 82.96  | 70.35 | 0.33  |
|     |             |      |        |       |       | 296 | A:LYS 296   |      | 127.50 | 43.50 | -0.62 |
|     |             |      |        |       |       | 297 | A:LEU 297   |      | 11.61  | 0.86  | -0.01 |

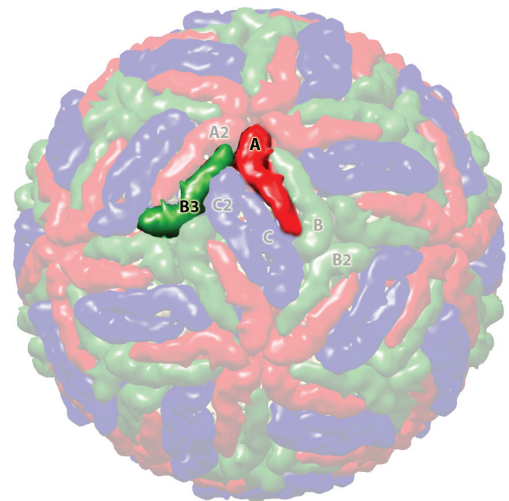

**Supplementary Figure 2. Non-quasi equivalent E-protein interfaces in TBEV particle.** The tables show hydrogen bonds, salt bridges and interfacing amino acids with buried surfaces participating in E-protein interactions. The interfaces are shown on the TBEV particles on the right side of the figure. Figure continued on next page.....

## E-protein A - C2 interfaces

| Hydrogen bonds |                  |           |                 |    |                  | Salt bridges |                 |  |  |  |  |
|----------------|------------------|-----------|-----------------|----|------------------|--------------|-----------------|--|--|--|--|
| ##             | Structure 1      | Dist. [Å] | Structure 2     | ## | Structure 1      | Dist. [Å]    | Structure 2     |  |  |  |  |
| 1              | C2:GLN 391[ N ]  | 2.51      | A:VAL 167[ O ]  | 1  | C2:HIS 347[ NE2] | 3.21         | A:GLU 291[ OE1] |  |  |  |  |
| 2              | C2:GLN 391[ NE2] | 2.97      | A:SER 169[ O ]  | 2  | C2:HIS 347[ ND1] | 3.71         | A:GLU 291[ OE2] |  |  |  |  |
| 3              | C2:ASP 380[ OD2] | 3.52      | A:SER 190[ OG ] | 3  | C2:HIS 347[ NE2] | 2.64         | A:GLU 291[ OE2] |  |  |  |  |
|                |                  |           |                 | 4  | C2:ASP 380[ OD2] | 3.73         | A:ARG 187[ NE ] |  |  |  |  |

**Interface area: 470 Å<sup>2</sup>**

| Interfacing residues |             |      |        |        |       |
|----------------------|-------------|------|--------|--------|-------|
| ##                   | Structure 1 | HSDC | ASA    | BSA    | ΔG    |
| 314                  | C2:TRP 314  |      | 65.08  | 5.58   | 0.01  |
| 317                  | C2:ALA 317  |      | 60.00  | 13.56  | 0.22  |
| 318                  | C2:PRO 318  |      | 8.71   | 8.22   | -0.09 |
| 319                  | C2:THR 319  |      | 61.24  | 3.68   | 0.06  |
| 347                  | C2:HIS 347  | S    | 149.57 | 80.08  | 0.60  |
| 380                  | C2:ASP 380  | HS   | 84.95  | 52.29  | -0.39 |
| 382                  | C2:ILE 382  |      | 26.60  | 16.55  | 0.26  |
| 384                  | C2:TYR 384  |      | 56.91  | 24.19  | 0.08  |
| 387                  | C2:GLU 387  |      | 116.52 | 11.10  | -0.09 |
| 388                  | C2:LEU 388  |      | 40.87  | 1.34   | 0.02  |
| 389                  | C2:SER 389  |      | 55.80  | 47.80  | -0.38 |
| 390                  | C2:HIS 390  |      | 59.88  | 52.88  | -0.12 |
| 391                  | C2:GLN 391  | H    | 129.68 | 121.96 | 0.15  |
| 392                  | C2:TRP 392  |      | 34.38  | 5.94   | 0.07  |
| 393                  | C2:PHE 393  |      | 127.41 | 29.08  | 0.42  |

| ##  | Structure 2 | HSDC | ASA    | BSA   | ΔG    |
|-----|-------------|------|--------|-------|-------|
| 135 | A:ASN 135   |      | 102.88 | 38.05 | -0.25 |
| 166 | A:THR 166   |      | 38.97  | 0.37  | -0.00 |
| 167 | A:VAL 167   | H    | 83.73  | 70.48 | 0.58  |
| 168 | A:SER 168   |      | 104.25 | 44.79 | 0.54  |
| 169 | A:SER 169   | H    | 36.75  | 11.32 | -0.10 |
| 170 | A:GLU 170   |      | 144.22 | 87.14 | 0.06  |
| 185 | A:LEU 185   |      | 51.30  | 21.23 | 0.34  |
| 186 | A:CYS 186   |      | 8.81   | 8.23  | -0.09 |
| 187 | A:ARG 187   | S    | 104.97 | 90.72 | -0.40 |
| 188 | A:VAL 188   |      | 18.42  | 7.09  | 0.00  |
| 189 | A:ALA 189   |      | 100.01 | 57.20 | 0.82  |
| 190 | A:SER 190   |      | 42.16  | 17.50 | 0.27  |
| 291 | A:GLU 291   | S    | 28.77  | 9.82  | -0.15 |

ASA Accessible Surface Area, Å<sup>2</sup> BSA Buried Surface Area, Å<sup>2</sup> ΔG Solvation energy effect, kcal/mol || Buried area percentage, one bar per 10%

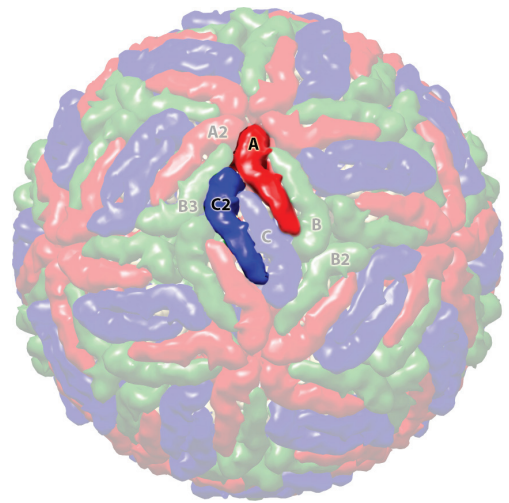

## E-protein C - C2 interfaces

| Hydrogen bonds |                  |           |                 |     |             |
|----------------|------------------|-----------|-----------------|-----|-------------|
| ##             | Structure 1      | Dist. [Å] | Structure 2     | ##  | Structure 2 |
| 1              | C2:GLY 102[ N ]  | 3.18      | C:TYR 150[ OH ] | 4   | C:THR 4     |
| 2              | C2:HIS 208[ ND1] | 3.70      | C:VAL 254[ O ]  | 5   | C:HIS 5     |
| 3              | C2:HIS 208[ NE2] | 3.22      | C:LEU 65[ O ]   | 7   | C:GLU 7     |
| 4              | C2:ASN 256[ N ]  | 2.63      | C:HIS 208[ O ]  | 62  | C:HIS 62    |
| 5              | C2:LYS 266[ NZ ] | 2.49      | C:GLN 260[ OE1] | 65  | C:LEU 65    |
| 6              | C2:TYR 150[ OH ] | 3.18      | C:GLY 102[ N ]  | 66  | C:SER 66    |
| 7              | C2:VAL 254[ O ]  | 3.70      | C:HIS 208[ ND1] | 67  | C:ASP 67    |
| 8              | C2:LEU 65[ O ]   | 3.22      | C:HIS 208[ NE2] | 68  | C:THR 68    |
| 9              | C2:HIS 208[ O ]  | 2.63      | C:ASN 256[ N ]  | 98  | C:ASP 98    |
| 10             | C2:GLN 260[ OE1] | 2.49      | C:LYS 266[ NZ ] | 100 | C:GLY 100   |

**Interface area: 1570 Å<sup>2</sup>**

| Interfacing residues |             |      |        |        |       |
|----------------------|-------------|------|--------|--------|-------|
| ##                   | Structure 1 | HSDC | ASA    | BSA    | ΔG    |
| 4                    | C2:THR 4    |      | 29.46  | 22.95  | -0.06 |
| 5                    | C2:HIS 5    |      | 64.51  | 23.19  | 0.02  |
| 7                    | C2:GLU 7    |      | 159.27 | 34.61  | 0.06  |
| 62                   | C2:HIS 62   |      | 51.27  | 8.13   | 0.13  |
| 65                   | C2:LEU 65   | H    | 45.97  | 29.64  | 0.15  |
| 66                   | C2:SER 66   |      | 54.34  | 5.52   | -0.09 |
| 67                   | C2:ASP 67   |      | 85.01  | 0.14   | -0.00 |
| 68                   | C2:THR 68   |      | 78.34  | 17.64  | -0.20 |
| 98                   | C2:ASP 98   |      | 93.78  | 41.72  | -0.24 |
| 100                  | C2:GLY 100  |      | 16.74  | 13.23  | 0.21  |
| 101                  | C2:TRP 101  |      | 167.93 | 132.06 | 1.51  |
| 102                  | C2:GLY 102  | H    | 72.84  | 69.19  | 0.52  |
| 103                  | C2:ASN 103  |      | 29.57  | 2.14   | -0.00 |
| 104                  | C2:HIS 104  |      | 161.67 | 37.00  | -0.11 |
| 106                  | C2:GLY 106  |      | 54.47  | 5.40   | -0.06 |
| 107                  | C2:LEU 107  |      | 104.44 | 21.41  | 0.34  |
| 108                  | C2:PHE 108  |      | 137.30 | 106.92 | 1.61  |
| 110                  | C2:LYS 110  |      | 101.89 | 1.96   | -0.01 |
| 117                  | C2:VAL 117  |      | 2.26   | 0.84   | 0.01  |
| 125                  | C2:LYS 125  |      | 67.49  | 9.60   | -0.36 |
| 150                  | C2:TYR 150  | H    | 79.73  | 35.44  | 0.02  |
| 152                  | C2:ALA 152  |      | 46.09  | 34.81  | 0.56  |
| 153                  | C2:ALA 153  |      | 83.36  | 16.65  | 0.16  |
| 154                  | C2:ASN 154  |      | 134.90 | 19.33  | -0.13 |
| 155                  | C2:GLU 155  |      | 104.11 | 1.56   | 0.02  |
| 206                  | C2:VAL 206  |      | 67.32  | 4.85   | 0.08  |
| 207                  | C2:GLU 207  |      | 145.95 | 2.21   | -0.03 |
| 208                  | C2:HIS 208  | H    | 163.42 | 144.51 | 0.39  |
| 209                  | C2:LEU 209  |      | 55.06  | 29.22  | 0.45  |
| 210                  | C2:PRO 210  |      | 59.48  | 33.09  | 0.53  |
| 225                  | C2:LEU 225  |      | 27.25  | 4.02   | 0.06  |
| 241                  | C2:LEU 241  |      | 2.01   | 0.84   | 0.01  |
| 254                  | C2:VAL 254  | H    | 32.62  | 22.83  | -0.15 |
| 255                  | C2:TYR 255  |      | 114.63 | 64.91  | 0.84  |
| 256                  | C2:ASN 256  | H    | 59.13  | 46.64  | -0.05 |
| 257                  | C2:LEU 257  |      | 83.65  | 49.54  | 0.48  |
| 258                  | C2:GLY 258  |      | 24.08  | 18.73  | 0.30  |
| 259                  | C2:ASP 259  |      | 60.98  | 56.80  | -0.06 |
| 260                  | C2:GLN 260  | H    | 33.63  | 28.56  | -0.33 |
| 261                  | C2:THR 261  |      | 26.31  | 12.38  | 0.20  |
| 262                  | C2:GLY 262  |      | 44.24  | 43.07  | 0.48  |
| 263                  | C2:VAL 263  |      | 97.65  | 47.52  | 0.76  |
| 265                  | C2:LEU 265  |      | 59.16  | 36.75  | 0.56  |
| 266                  | C2:LYS 266  | H    | 173.11 | 71.14  | -0.53 |
| 273                  | C2:VAL 273  |      | 68.14  | 4.35   | 0.07  |
| 316                  | C2:ARG 316  |      | 81.38  | 66.63  | -2.36 |
| 317                  | C2:ALA 317  |      | 60.00  | 0.12   | -0.00 |
| 319                  | C2:THR 319  |      | 61.24  | 43.72  | 0.17  |
| 320                  | C2:ASP 320  |      | 48.78  | 18.40  | -0.11 |
| 321                  | C2:SER 321  |      | 26.59  | 22.22  | 0.13  |
| 322                  | C2:GLY 322  |      | 66.83  | 6.81   | 0.04  |
| 327                  | C2:VAL 327  |      | 6.02   | 4.60   | 0.07  |
| 329                  | C2:GLU 329  |      | 37.68  | 1.35   | -0.02 |

ASA Accessible Surface Area, Å<sup>2</sup> BSA Buried Surface Area, Å<sup>2</sup> ΔG Solvation energy effect, kcal/mol || Buried area percentage, one bar per 10%

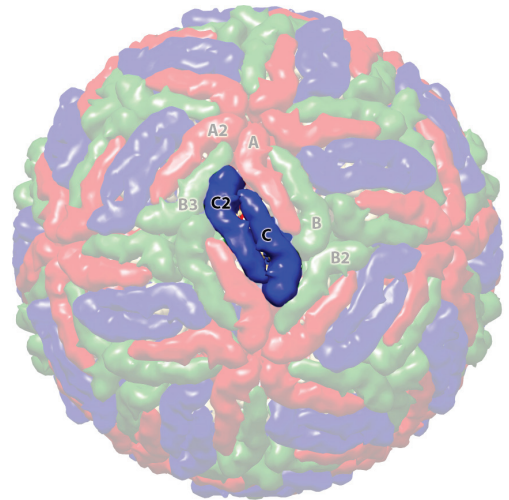

**Supplementary Figure 2 (continued). Non-quasi equivalent E-protein interfaces in TBEV particle.** The tables show hydrogen bonds, salt bridges and interfacing amino acids with buried surfaces participating in E-protein interactions. The interfaces are shown on the TBEV particles on the right side of the figure. Figure continued on next page.....

## E-protein A - C interfaces

Interface area: 330 Å<sup>2</sup>

**Interfacing residues**

Inaccessible residues  
 Solvent-accessible residues  
 Residues making Hydrogen/Disulphide bond, Salt bridge or Covalent link  
 Interfacing residues  
 ASA Accessible Surface Area, Å<sup>2</sup> BSA Buried Surface Area, Å<sup>2</sup> ΔG Solvation energy effect, kcal/mol ||| Buried area percentage, one bar per 10%

| #   | Structure 1 | HSDC | ASA    | BSA   | ΔG    | #   | Structure 2 | HSDC | ASA    | BSA   | ΔG    |
|-----|-------------|------|--------|-------|-------|-----|-------------|------|--------|-------|-------|
| 54  | C:ALA 54    |      | 74.08  | 7.87  | 0.13  | 54  | A:ALA 54    |      | 73.75  | 8.22  | 0.13  |
| 76  | C:THR 76    |      | 101.27 | 8.42  | -0.06 | 73  | A:ARG 73    |      | 100.87 | 2.48  | -0.03 |
| 78  | C:GLY 78    |      | 41.94  | 14.11 | 0.23  | 76  | A:THR 76    |      | 99.68  | 7.57  | -0.08 |
| 79  | C:PRO 79    |      | 90.36  | 35.23 | 0.42  | 78  | A:GLY 78    |      | 42.78  | 19.26 | 0.31  |
| 81  | C:THR 81    |      | 90.49  | 14.92 | 0.20  | 79  | A:PRO 79    |      | 88.06  | 31.12 | 0.32  |
| 86  | C:HIS 86    |      | 167.33 | 93.21 | -0.02 | 81  | A:THR 81    |      | 88.55  | 23.46 | 0.26  |
| 87  | C:GLN 87    |      | 80.08  | 4.28  | -0.04 | 86  | A:HIS 86    |      | 165.17 | 98.54 | 0.96  |
| 88  | C:GLY 88    |      | 43.41  | 13.21 | 0.18  | 87  | A:GLN 87    |      | 82.14  | 6.44  | 0.26  |
| 89  | C:GLY 89    |      | 15.74  | 4.95  | -0.06 | 88  | A:GLY 88    |      | 44.17  | 15.86 | 0.12  |
| 107 | C:LEU 107   |      | 164.44 | 11.64 | 0.19  | 89  | A:GLY 89    |      | 14.49  | 3.93  | -0.04 |
| 135 | C:ASN 135   |      | 101.97 | 10.43 | -0.12 | 107 | A:LEU 107   |      | 106.14 | 9.63  | 0.15  |
| 229 | C:HIS 229   |      | 84.52  | 54.11 | 0.13  | 135 | A:ASN 135   |      | 102.88 | 12.00 | -0.14 |
| 230 | C:GLU 230   |      | 128.43 | 2.33  | -0.03 | 229 | A:HIS 229   |      | 88.31  | 52.32 | 0.13  |
| 232 | C:ALA 232   |      | 38.78  | 14.56 | 0.23  | 232 | A:ALA 232   |      | 39.90  | 14.24 | 0.23  |
| 234 | C:ASN 234   |      | 66.25  | 17.93 | 0.04  | 234 | A:ASN 234   |      | 66.57  | 17.93 | 0.02  |
| 235 | C:TRP 235   |      | 25.12  | 3.56  | -0.04 | 235 | A:TRP 235   |      | 24.33  | 2.09  | -0.02 |
| 236 | C:ASN 236   |      | 70.79  | 19.77 | -0.25 | 236 | A:ASN 236   |      | 71.56  | 7.05  | -0.08 |

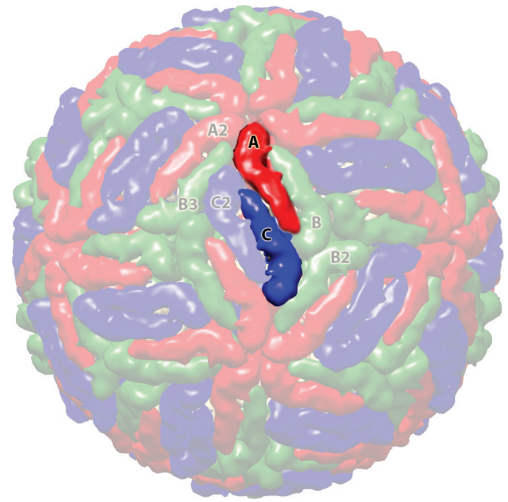

## E-protein B - C interfaces

**Hydrogen bonds**

| # | Structure 1      | Dist. [Å] | Structure 2      |
|---|------------------|-----------|------------------|
| 1 | C:VAL 167[ O ]   | 2.72      | B:GLN 391[ N ]   |
| 2 | C:SER 169[ O ]   | 3.43      | B:GLN 391[ NE2 ] |
| 3 | C:GLU 170[ OE1 ] | 3.54      | B:TYR 384[ OH ]  |
| 4 | C:GLU 291[ OE1 ] | 3.10      | B:HIS 347[ NE2 ] |

**Salt bridges**

| # | Structure 1      | Dist. [Å] | Structure 2      |
|---|------------------|-----------|------------------|
| 1 | C:ARG 187[ NE ]  | 3.85      | B:ASP 380[ OD2 ] |
| 2 | C:GLU 291[ OE1 ] | 3.10      | B:HIS 347[ NE2 ] |
| 3 | C:GLU 291[ OE2 ] | 3.93      | B:HIS 347[ NE2 ] |

Interface area: 470 Å<sup>2</sup>

**Interfacing residues**

Inaccessible residues  
 Solvent-accessible residues  
 Residues making Hydrogen/Disulphide bond, Salt bridge or Covalent link  
 Interfacing residues  
 ASA Accessible Surface Area, Å<sup>2</sup> BSA Buried Surface Area, Å<sup>2</sup> ΔG Solvation energy effect, kcal/mol ||| Buried area percentage, one bar per 10%

| #   | Structure 1 | HSDC | ASA    | BSA   | ΔG    | #   | Structure 2 | HSDC | ASA    | BSA    | ΔG    |
|-----|-------------|------|--------|-------|-------|-----|-------------|------|--------|--------|-------|
| 20  | C:ARG 20    |      | 128.00 | 8.29  | -0.09 | 314 | B:TRP 314   |      | 71.47  | 5.50   | -0.02 |
| 135 | C:ASN 135   |      | 101.97 | 40.61 | -0.32 | 317 | B:ALA 317   |      | 65.45  | 17.74  | 0.28  |
| 166 | C:THR 166   |      | 41.55  | 0.37  | -0.00 | 318 | B:PRO 318   |      | 8.00   | 6.62   | -0.08 |
| 167 | C:VAL 167   | H    | 77.33  | 62.52 | 0.40  | 319 | B:THR 319   |      | 68.89  | 2.01   | 0.03  |
| 168 | C:SER 168   |      | 102.99 | 43.16 | 0.51  | 347 | B:HIS 347   | HS   | 151.61 | 72.58  | 0.65  |
| 169 | C:SER 169   | H    | 38.86  | 14.51 | -0.11 | 380 | B:ASP 380   | S    | 92.85  | 53.37  | -0.20 |
| 170 | C:GLU 170   | H    | 140.63 | 79.18 | 0.25  | 382 | B:LEU 382   |      | 31.09  | 23.34  | 0.37  |
| 185 | C:LEU 185   |      | 58.73  | 30.65 | 0.49  | 384 | B:TYR 384   | H    | 56.94  | 28.39  | 0.04  |
| 186 | C:CYS 186   |      | 7.64   | 6.26  | -0.07 | 387 | B:GLU 387   |      | 117.56 | 9.08   | -0.05 |
| 187 | C:ARG 187   | S    | 100.69 | 80.71 | -0.59 | 388 | B:LEU 388   |      | 41.44  | 1.84   | 0.03  |
| 188 | C:VAL 188   |      | 11.27  | 7.10  | 0.01  | 389 | B:SER 389   |      | 55.86  | 48.70  | -0.37 |
| 189 | C:ALA 189   |      | 102.23 | 57.29 | 0.82  | 390 | B:HIS 390   |      | 62.45  | 54.10  | -0.12 |
| 190 | C:SER 190   |      | 40.95  | 19.49 | 0.31  | 391 | B:GLN 391   | H    | 126.80 | 123.60 | 0.10  |
| 291 | C:GLU 291   | HS   | 31.26  | 14.15 | -0.17 | 392 | B:TRP 392   |      | 36.44  | 6.23   | 0.07  |
|     |             |      |        |       |       | 393 | B:PHE 393   |      | 126.21 | 25.63  | 0.37  |

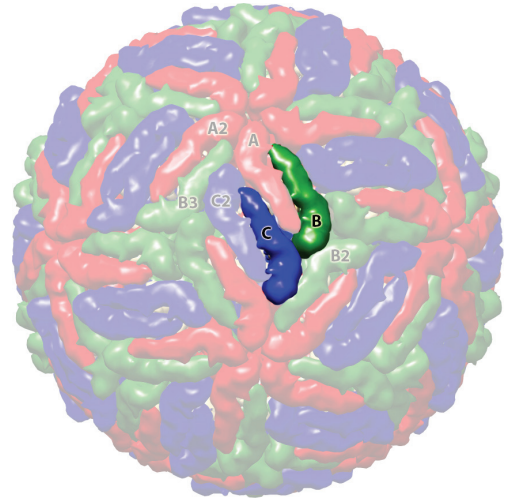

## E-protein C - B2 interfaces

**Salt bridges**

| # | Structure 1      | Dist. [Å] | Structure 2      |
|---|------------------|-----------|------------------|
| 1 | C:ASP 351[ OD2 ] | 3.18      | B2:ARG 94[ NE ]  |
| 2 | C:ASP 351[ OD2 ] | 3.15      | B2:ARG 94[ NH1 ] |
| 3 | C:ASP 351[ OD2 ] | 3.91      | B2:ARG 94[ NH2 ] |

Interface area: 580 Å<sup>2</sup>

**Interfacing residues**

Inaccessible residues  
 Solvent-accessible residues  
 Residues making Hydrogen/Disulphide bond, Salt bridge or Covalent link  
 Interfacing residues  
 ASA Accessible Surface Area, Å<sup>2</sup> BSA Buried Surface Area, Å<sup>2</sup> ΔG Solvation energy effect, kcal/mol ||| Buried area percentage, one bar per 10%

| #   | Structure 1 | HSDC | ASA    | BSA    | ΔG    | #   | Structure 2 | HSDC | ASA    | BSA    | ΔG    |
|-----|-------------|------|--------|--------|-------|-----|-------------|------|--------|--------|-------|
| 16  | C:GLN 16    |      | 144.34 | 111.23 | -0.00 | 54  | B2:ALA 54   |      | 75.40  | 13.90  | 0.22  |
| 17  | C:GLY 17    |      | 63.69  | 2.51   | 0.04  | 56  | B2:THR 56   |      | 29.41  | 0.34   | 0.01  |
| 36  | C:GLU 36    |      | 107.96 | 3.44   | -0.04 | 57  | B2:ARG 57   |      | 57.79  | 3.16   | 0.29  |
| 37  | C:GLY 37    |      | 43.21  | 19.99  | 0.04  | 81  | B2:THR 81   |      | 91.51  | 17.91  | -0.01 |
| 38  | C:LYS 38    |      | 37.75  | 10.82  | -0.20 | 83  | B2:ALA 83   |      | 73.87  | 28.37  | 0.41  |
| 171 | C:LYS 171   |      | 100.58 | 2.37   | -0.09 | 85  | B2:GLU 85   |      | 44.55  | 17.04  | -0.16 |
| 295 | C:GLU 295   |      | 92.73  | 23.57  | 0.08  | 86  | B2:HIS 86   |      | 167.84 | 111.63 | 0.33  |
| 296 | C:LYS 296   |      | 125.93 | 1.34   | 0.02  | 87  | B2:GLN 87   |      | 81.70  | 38.89  | 0.14  |
| 297 | C:LEU 297   |      | 11.88  | 4.54   | -0.05 | 88  | B2:GLY 88   |      | 42.00  | 9.30   | 0.01  |
| 298 | C:LYS 298   |      | 122.60 | 18.41  | 0.29  | 94  | B2:ARG 94   | S    | 113.45 | 25.86  | 0.18  |
| 299 | C:MET 299   |      | 42.54  | 2.87   | 0.01  | 118 | B2:LYS 118  |      | 81.47  | 0.26   | -0.01 |
| 302 | C:LEU 302   |      | 103.28 | 76.11  | 0.88  | 136 | B2:LYS 136  |      | 133.30 | 4.64   | -0.06 |
| 303 | C:THR 303   |      | 133.59 | 33.11  | 0.37  | 227 | B2:TRP 227  |      | 54.30  | 11.88  | 0.19  |
| 304 | C:TYR 304   |      | 60.40  | 0.61   | -0.01 | 228 | B2:LYS 228  |      | 19.10  | 0.50   | 0.01  |
| 306 | C:MET 306   |      | 104.04 | 34.57  | 0.68  | 229 | B2:HIS 229  |      | 87.17  | 79.37  | 1.10  |
| 309 | C:LYS 309   |      | 117.23 | 42.04  | -0.39 | 230 | B2:GLU 230  |      | 126.73 | 27.82  | -0.18 |
| 339 | C:ARG 339   |      | 71.88  | 31.03  | -0.75 | 231 | B2:GLY 231  |      | 81.35  | 45.94  | 0.04  |
| 343 | C:ARG 343   |      | 102.64 | 41.94  | 0.34  | 232 | B2:ALA 232  |      | 38.31  | 16.67  | 0.25  |
| 345 | C:VAL 345   |      | 8.18   | 1.67   | 0.03  | 233 | B2:ARG 233  |      | 218.63 | 105.43 | -0.32 |
| 350 | C:PRO 350   |      | 98.86  | 7.97   | 0.01  | 234 | B2:ASN 234  |      | 65.04  | 14.67  | -0.17 |
| 351 | C:ASP 351   | S    | 142.20 | 101.19 | -0.57 | 236 | B2:ASN 236  |      | 71.34  | 0.12   | -0.00 |
| 353 | C:ASN 353   |      | 78.52  | 14.73  | 0.11  |     |             |      |        |        |       |

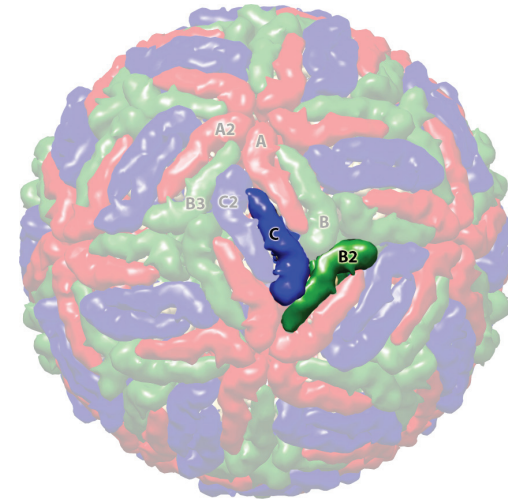

**Supplementary Figure 2 (continued). Non-quasi equivalent E-protein interfaces in TBEV particle.** The tables show hydrogen bonds, salt bridges and interfacing amino acids with buried surfaces participating in E-protein interactions. The interfaces are shown on the TBEV particles on the right side of the figure.

**a**

**Hydrogen bonds**

| ## | Structure 1     | Dist. [Å] | Structure 2     |
|----|-----------------|-----------|-----------------|
| 1  | B:HIS 208[ NE2] | 3.50      | A:LEU 65[ O ]   |
| 2  | B:GLY 102[ N ]  | 3.78      | A:TYR 150[ OH ] |
| 3  | B:ASN 256[ N ]  | 2.86      | A:HIS 208[ O ]  |
| 4  | B:HIS 208[ ND1] | 3.70      | A:VAL 254[ O ]  |
| 5  | B:LYS 266[ NZ]  | 2.68      | A:GLN 260[ OE1] |
| 6  | B:LEU 65[ O ]   | 3.38      | A:HIS 208[ NE2] |
| 7  | B:TYR 150[ OH ] | 3.71      | A:GLY 102[ N ]  |
| 8  | B:HIS 208[ O ]  | 2.83      | A:ASN 256[ N ]  |
| 9  | B:VAL 254[ O ]  | 3.25      | A:HIS 208[ ND1] |
| 10 | B:GLN 260[ OE1] | 2.46      | A:LYS 266[ NZ ] |

**Interface area: 1490 Å<sup>2</sup>**

| ##  | Structure 1 | HSDC | ASA    | BSA    | ΔG    | Interfacing residues |     |    |     |     |    |
|-----|-------------|------|--------|--------|-------|----------------------|-----|----|-----|-----|----|
|     |             |      |        |        |       | ASA                  | BSA | ΔG | ASA | BSA | ΔG |
| 4   | B:THR 4     |      | 33.35  | 25.41  | -0.09 |                      |     |    |     |     |    |
| 5   | B:HIS 5     |      | 66.70  | 24.58  | 0.03  |                      |     |    |     |     |    |
| 6   | B:LEU 6     |      | 60.50  | 0.33   | 0.01  |                      |     |    |     |     |    |
| 7   | B:GLU 7     |      | 158.60 | 30.78  | 0.18  |                      |     |    |     |     |    |
| 62  | B:HIS 62    |      | 50.40  | 5.32   | 0.09  |                      |     |    |     |     |    |
| 65  | B:LEU 65    | H    | 45.68  | 31.19  | 0.13  |                      |     |    |     |     |    |
| 66  | B:SER 66    |      | 48.43  | 3.18   | 0.05  |                      |     |    |     |     |    |
| 68  | B:THR 68    |      | 77.63  | 16.98  | -0.19 |                      |     |    |     |     |    |
| 98  | B:ASP 98    |      | 95.69  | 38.21  | -0.17 |                      |     |    |     |     |    |
| 100 | B:GLY 100   |      | 17.24  | 14.40  | 0.23  |                      |     |    |     |     |    |
| 101 | B:TRP 101   |      | 164.53 | 116.73 | 1.21  |                      |     |    |     |     |    |
| 102 | B:GLY 102   | H    | 72.67  | 65.96  | 0.49  |                      |     |    |     |     |    |
| 103 | B:ASN 103   |      | 30.66  | 0.15   | -0.00 |                      |     |    |     |     |    |
| 104 | B:HIS 104   |      | 161.33 | 36.86  | -0.32 |                      |     |    |     |     |    |
| 106 | B:GLY 106   |      | 50.90  | 4.17   | -0.05 |                      |     |    |     |     |    |
| 107 | B:LEU 107   |      | 107.17 | 23.09  | 0.37  |                      |     |    |     |     |    |
| 108 | B:PHE 108   |      | 132.68 | 101.70 | 1.53  |                      |     |    |     |     |    |
| 109 | B:GLY 109   |      | 39.94  | 0.29   | -0.00 |                      |     |    |     |     |    |
| 110 | B:LYS 110   |      | 103.14 | 0.79   | -0.03 |                      |     |    |     |     |    |
| 117 | B:VAL 117   |      | 2.27   | 0.67   | 0.01  |                      |     |    |     |     |    |
| 125 | B:LYS 125   |      | 66.92  | 5.40   | -0.20 |                      |     |    |     |     |    |
| 150 | B:TYR 150   | H    | 75.35  | 30.46  | -0.00 |                      |     |    |     |     |    |
| 152 | B:ALA 152   |      | 41.77  | 28.96  | 0.46  |                      |     |    |     |     |    |
| 153 | B:ALA 153   |      | 78.25  | 14.21  | 0.14  |                      |     |    |     |     |    |
| 154 | B:ASN 154   |      | 130.58 | 26.79  | -0.20 |                      |     |    |     |     |    |
| 206 | B:VAL 206   |      | 68.39  | 2.34   | 0.04  |                      |     |    |     |     |    |
| 207 | B:GLU 207   |      | 144.25 | 1.47   | -0.02 |                      |     |    |     |     |    |
| 208 | B:HIS 208   | H    | 163.73 | 134.22 | 0.35  |                      |     |    |     |     |    |
| 209 | B:LEU 209   |      | 59.34  | 31.15  | 0.47  |                      |     |    |     |     |    |
| 210 | B:PRO 210   |      | 53.32  | 26.51  | 0.41  |                      |     |    |     |     |    |
| 225 | B:LEU 225   |      | 25.60  | 0.50   | 0.01  |                      |     |    |     |     |    |
| 254 | B:VAL 254   | H    | 31.47  | 22.54  | -0.13 |                      |     |    |     |     |    |
| 255 | B:TYR 255   |      | 111.92 | 60.22  | 0.81  |                      |     |    |     |     |    |
| 256 | B:ASN 256   | H    | 59.66  | 43.28  | -0.06 |                      |     |    |     |     |    |
| 257 | B:LEU 257   |      | 85.28  | 46.07  | 0.45  |                      |     |    |     |     |    |
| 258 | B:GLY 258   |      | 25.59  | 17.89  | 0.28  |                      |     |    |     |     |    |
| 259 | B:ASP 259   |      | 61.62  | 55.28  | -0.05 |                      |     |    |     |     |    |
| 260 | B:GLN 260   | H    | 33.66  | 22.65  | -0.26 |                      |     |    |     |     |    |
| 261 | B:THR 261   |      | 31.15  | 15.34  | 0.23  |                      |     |    |     |     |    |
| 262 | B:GLY 262   |      | 42.35  | 41.63  | 0.45  |                      |     |    |     |     |    |
| 263 | B:VAL 263   |      | 95.11  | 51.06  | 0.81  |                      |     |    |     |     |    |
| 265 | B:LEU 265   |      | 57.48  | 31.93  | 0.47  |                      |     |    |     |     |    |
| 266 | B:LYS 266   | H    | 173.13 | 67.13  | -0.49 |                      |     |    |     |     |    |
| 273 | B:VAL 273   |      | 66.78  | 5.19   | 0.08  |                      |     |    |     |     |    |
| 316 | B:ARG 316   |      | 73.43  | 55.15  | -0.01 |                      |     |    |     |     |    |
| 317 | B:ALA 317   |      | 65.45  | 1.03   | -0.01 |                      |     |    |     |     |    |
| 319 | B:THR 319   |      | 68.89  | 52.90  | 0.33  |                      |     |    |     |     |    |
| 320 | B:ASP 320   |      | 48.31  | 16.72  | -0.12 |                      |     |    |     |     |    |
| 321 | B:SER 321   |      | 28.01  | 24.36  | 0.09  |                      |     |    |     |     |    |
| 322 | B:GLY 322   |      | 67.50  | 5.23   | 0.03  |                      |     |    |     |     |    |
| 327 | B:VAL 327   |      | 10.87  | 10.20  | 0.16  |                      |     |    |     |     |    |

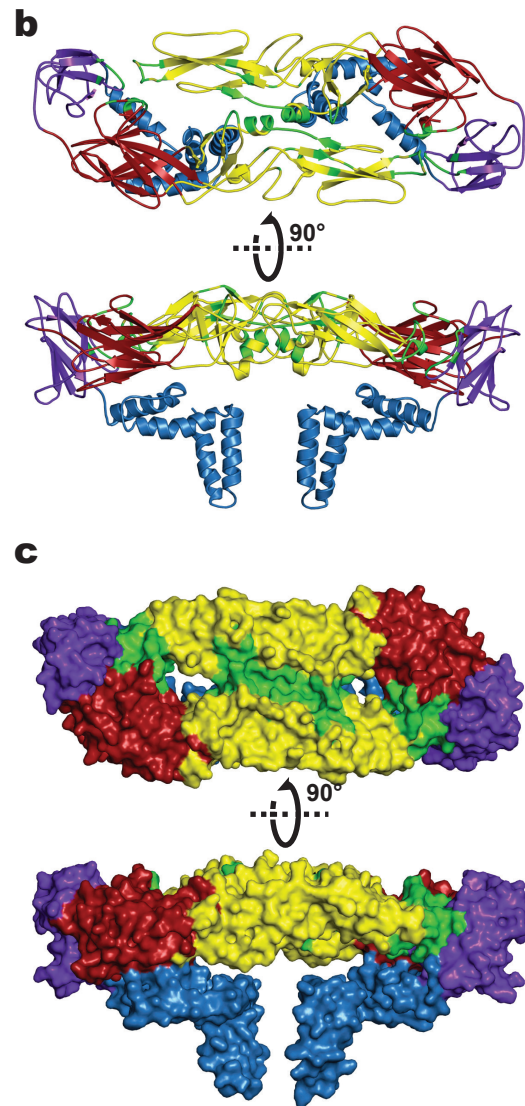

**Supplementary Figure 3. E-protein dimer interaction interfaces.** (a) Lists of residues forming hydrogen bonds and forming hydrophobic or polar interactions. Residues forming the fusogenic loop (in red frame) from domain II of E-protein are not solvent-accessible. (b) The interfacing residues are shown in green in cartoon representation of the E-protein dimer. E-protein domain I is shown in red, domain II in yellow, domain III in violet, and domain IV in blue. (c) The interfacing residues are shown in green in molecular surface representation of the E-protein dimer.

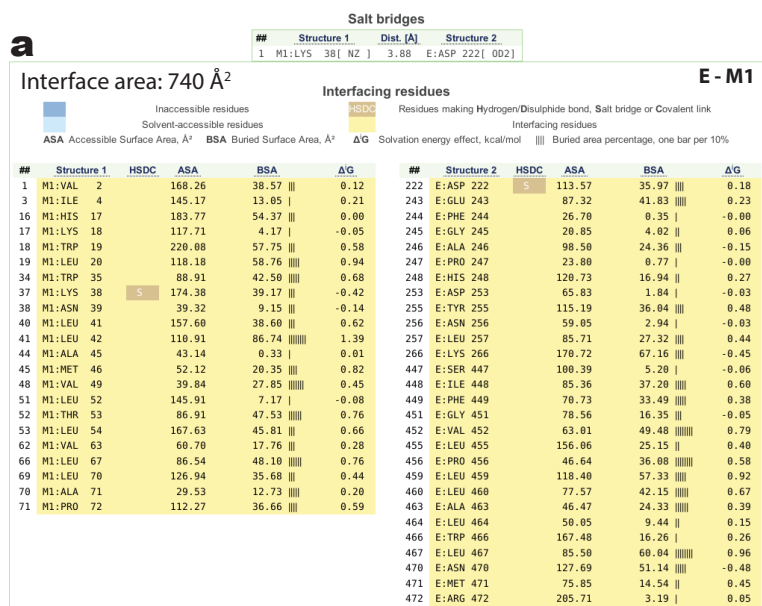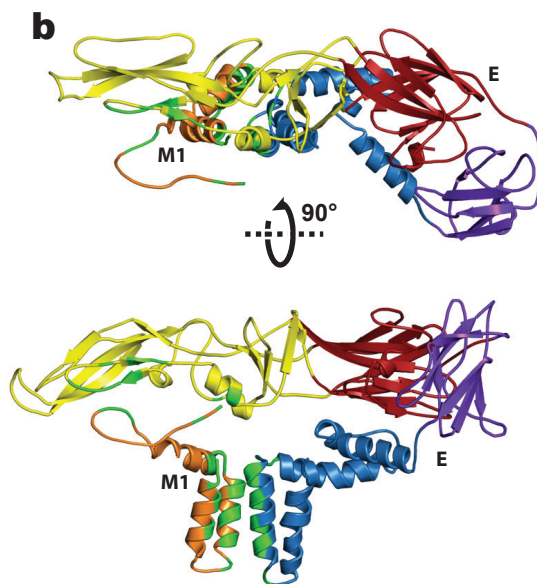

**c**

Hydrogen bonds

| # | Structure 1        | Dist. [Å] | Structure 2       |
|---|--------------------|-----------|-------------------|
| 1 | M2: HIS 7 [ N ]    | 2.96      | E: ALA 267 [ O ]  |
| 2 | M2: THR 13 [ OG1 ] | 2.81      | E: SER 285 [ OG ] |
| 3 | M2: ARG 15 [ N ]   | 3.87      | E: SER 285 [ OG ] |
| 4 | M2: ARG 15 [ NH2 ] | 3.27      | E: GLU 411 [ O ]  |
| 5 | M2: TRP 19 [ N ]   | 3.44      | E: VAL 271 [ O ]  |
| 6 | M2: HIS 17 [ O ]   | 2.80      | E: VAL 273 [ N ]  |

Salt bridges

| # | Structure 1        | Dist. [Å] | Structure 2       |
|---|--------------------|-----------|-------------------|
| 1 | M2: ARG 15 [ NE ]  | 3.35      | E: GLU 26 [ OE1 ] |
| 2 | M2: ARG 15 [ NE ]  | 3.10      | E: GLU 26 [ OE2 ] |
| 3 | M2: ARG 15 [ NH2 ] | 3.58      | E: GLU 26 [ OE2 ] |

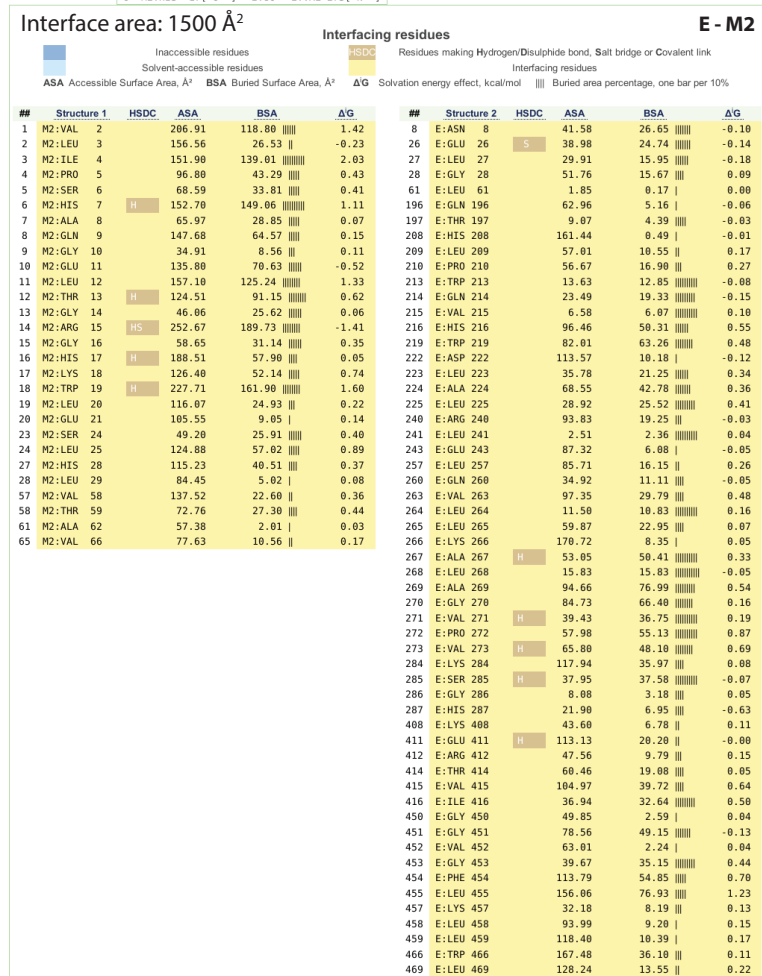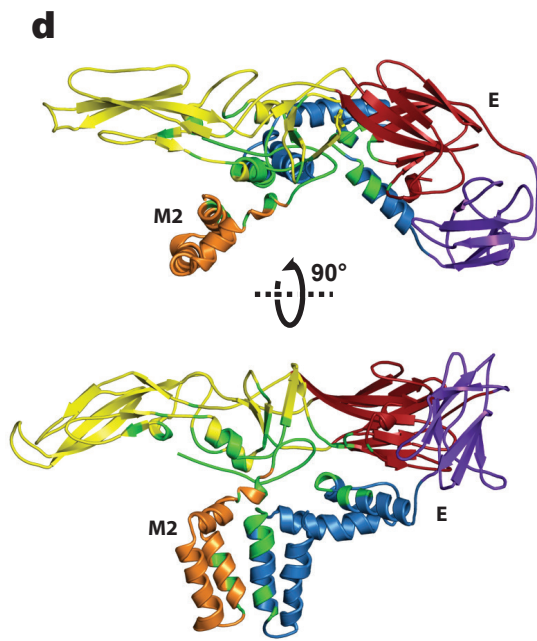

**Supplementary Figure 4. E-M interaction interfaces.** Interfacing amino acid residues were identified by PDBePISA. Every E-protein interacts with two M-proteins in the heterotetramer. (a, c) The tables show hydrogen bonds, salt bridges, and interfacing amino acids with the buried surface. (b, d) Cartoon representation of E/M-protein interfaces shown in tables. The interfacing residues are shown in green, M-protein in orange, and E-protein domain I in red, domain II in yellow, domain III in violet, and domain IV in blue.

### Flavivirus envelope protein alignment

|          |     |                                                               |     |       |                                  |
|----------|-----|---------------------------------------------------------------|-----|-------|----------------------------------|
| Q01299   | 175 | TMGEYGDVSLLCRVASGVDLAQTIVILELDKTVEHLPTAWQVHRDWFNDLALPWKHEGA-- | 232 | TBEVH | } tick-borne<br>flaviviruses     |
| P14336   | 175 | TMGEYGDVSLLCRVASGVDLAQTIVILELDKTVEHLPTAWQVHRDWFNDLALPWKHEGA-- | 232 | TBEVV |                                  |
| P07720   | 175 | TMGDYGDVSLLCRVASGVDLAQTIVILELDKTSEHLPTAWQVHRDWFNDLALPWKHEGA-- | 232 | TBEVS |                                  |
| P29837   | 175 | TLGDYGDVSLLCRVASGVDLAQTIVVLLDKTHEHLPTAWQVHRDWFNDLALPWKHDGA--  | 232 | LANVT |                                  |
| Q04538   | 175 | RLGDYGDVSLTCKVASGIDVAQTVVMSLDSKDHLPASAVQVHRDWFEDLALPWKHKDN--  | 232 | POWV  | } mosquito-borne<br>flaviviruses |
| P06935   | 175 | KLGEYGEVTDCEPRSGIDTSAYVMSVGE-----KSFLVHREWFMDLNLPSWSAGS--     | 226 | WNV   |                                  |
| P27395   | 179 | KLGDYGEVTLDCPEPRSGLNTEAFVMTVGS-----KSFLVHREWFMDLNLPSWSPSS--   | 230 | JEV   |                                  |
| P17763   | 174 | QLTDYGALTLDCSPRTGLDFNEMVLLTMEK-----KSWLVHKQWFLDLPLPWTSGASTS   | 227 | DENV1 |                                  |
| P29990   | 174 | ELTGYGTVMTECSPTGLDFNEMVLLQMEN-----KAWLVHRQWFLDLPLPWLPGADTQ    | 227 | DENV2 |                                  |
| Q6YMS4   | 172 | ILPEYGTGLGLECSPTGLDFNEMILLTMKN-----KAWMVHRQWFFDLPLPWASGATTE   | 225 | DENV3 |                                  |
| Q2YHF0   | 174 | KLPDYGELTLDCPEPRSGIDFNEMILMKMKT-----KTWLVHKQWFLDLPLPWTAGADTL  | 227 | DENV4 |                                  |
| P03314   | 171 | EFIGYGKATLECCQVQTAVDFGNSYIAEMET-----ESWIVDRQWAQDLTLPWQSGSG--  | 222 | YFV   |                                  |
| KJ776791 | 179 | TLGGFGSLGLDCEPRTGLDFSDLYLTMNN-----KHVLVHKQWFFHDIPLPWHAGADTG   | 232 | ZIKV  |                                  |

|          |     |                                                                 |     |       |
|----------|-----|-----------------------------------------------------------------|-----|-------|
| Q01299   | 233 | -RNWNAERLVEFGAPHAVKMDVYNLGDQTVLLKALAGVPVAHIEGTK---YHLKSGHV      | 288 | TBEVH |
| P14336   | 233 | -QNWNAERLVEFGAPHAVKMDVYNLGDQTVLLKALAGVPVAHIEGTK---YHLKSGHV      | 288 | TBEVV |
| P07720   | 233 | -QNWNAERLVEFGAPHAVKMDVYNLGDQTVLLKSLAGVPVAHIDGTK---YHLKSGHV      | 288 | TBEVS |
| P29837   | 233 | -EAWNEAGRLVEFGTPHAVKMDVFNLGDQTVLLKSLAGVPVASIEGTK---YHLKSGHV     | 288 | LANVT |
| Q04538   | 233 | -QDWSVEKLVFEGPPPHAVKMDVFNLGDQTVLLKSLAGVPLASVEGQK---YHLKSGHV     | 288 | POWV  |
| P06935   | 227 | -TTWRNRETLMEFEEPATKQSVVALGSEQEGALHQAALAGAIPEVSSNT---VKLTSGHL    | 282 | WNV   |
| P27395   | 231 | -TAWNRRELLMEFEGAPATKQSVVALGSEQEGGLHQAALAGAIIVVEYSS-S---VKLTSGHL | 285 | JEV   |
| P17763   | 228 | QETWNRQDLLVTFKTAHAKKQEVVVLGSEQEGAMHTALTGATEIQTSQT---TTIFAGHL    | 283 | DENV1 |
| P29990   | 228 | GSNWIQKETLVVTFKNPFAKKQDVVVLGSEQEGAMHTALTGATEIQSSSG---NLLFTGHL   | 283 | DENV2 |
| Q6YMS4   | 226 | TPTWNRKELLVTFKNAHAKKQEVVVLGSEQEGAMHTALTGATEIQSSSG---TSIFAGHL    | 281 | DENV3 |
| Q2YHF0   | 228 | EVHWNHKERMVTFKVPAHAKRQDVTVLGSQEGAMHSALAGATEVDSGDG---NHMFAGHL    | 283 | DENV4 |
| P03314   | 223 | -GVVREMHHLVEFEPHAATIRVLAALGNQEGSLTALTGAMRVTKDNDNNLYKLHGSHV      | 281 | YFV   |
| KJ776791 | 233 | TPHWNKEALVEFKDAHAKRQTVVVLGSEQEGAVHTALAGALEAEMDGA---GRLSSGHL     | 289 | ZIKV  |

|          |     |                                                               |     |       |
|----------|-----|---------------------------------------------------------------|-----|-------|
| Q01299   | 401 | RVFQKTKKGIERTLVIGEHAWDFGSAGGFLSSIGKALHTVLGGAFNSIFGGVGFPLKLLL  | 460 | TBEVH |
| P14336   | 401 | RVFQKTKKGIERTLVIGEHAWDFGSAGGFLSSIGKAVHTVLGGAFNSIFGGVGFPLKLLL  | 460 | TBEVV |
| P07720   | 401 | RVFQKTRKGIERTLVIGEHAWDFGSTGGFLTSGKALHTVLGGAFNSLFGGVGFPLKILV   | 460 | TBEVS |
| P29837   | 401 | RVLQKTRKGIERTLVIGEHAWDFGSVGGVMTSIGRAMHTVLGGAFNTLLGGVGFPLKILL  | 460 | LANVT |
| Q04538   | 402 | RMFEKTRRGLERLSSVGEHAWDFGSVGGVLSVSGKAIHTVLGGAFNTLFGGVGFIPKMLL  | 461 | POWV  |
| P06935   | 402 | KAFTTTLRGAQRLLAALGDTAWDFGSVGGVFTSVGKAIHQVFGGAFRSLFGGMSWITQGLL | 461 | WNV   |
| P27395   | 405 | KAFSTTLRGAQRLLAALGDTAWDFGSIGGVFNSIGRAVHQVFGGAFRTLFGGMSWITQGLM | 464 | JEV   |
| P17763   | 400 | KMFEATARGARRMAILGDTAWDFGSIGGVFTSVGKLIHQIFGTAYGVLFSGVSWTMKIGI  | 459 | DENV1 |
| P29990   | 400 | QMFETTRGAKRMAILGDTAWDFGSIGGVFTSIGKALHQVFGAIYGAAFSGVSWTMKILI   | 459 | DENV2 |
| Q6YMS4   | 398 | KMFEATERGARRMAILGDTAWDFGSVGGVLSLNSLGMVHQIFGSAYTALFSGVSWTMKIGI | 457 | DENV3 |
| Q2YHF0   | 400 | KMFESTYRGAKRMAILGETAWDFGSVGGLLTSLGKAVHQVFGSVYTTMFGGVSWMVRILI  | 459 | DENV4 |
| P03314   | 398 | KLFTQTMKQVERLAVMGDTAWDFSSAGGFFTSVGKGIHTVFGSAFQGLFGGLNWIITKVM  | 457 | YFV   |
| KJ776791 | 409 | KAFEATVRGAKRMAVLGDTAWDFGSVGGALNSLKGKIHQIFGAFAKSLFGGMSWFSQILI  | 468 | ZIKV  |

### Flavivirus membrane protein alignment

|          |   |                                                               |    |       |
|----------|---|---------------------------------------------------------------|----|-------|
| Q01299   | 1 | SVLIPSHAQGELTGRGHKWLEGDSLRLTHLTRVEGWVWKNRLLALAMVTVVWLTLESVVTR | 60 | TBEVH |
| P14336   | 1 | SVLIPSHAQGELTGRGHKWLEGDSLRLTHLTRVEGWVWKNRLLALAMVTVVWLTLESVVTR | 60 | TBEVV |
| P07720   | 1 | SVLIPSHAQGDLTGRGHKWLEGDSLRLTHLTRVEGWVWKNKVLTLAVIAVVWLTLESVVTR | 60 | TBEVS |
| P29837   | 1 | SVLIPSHAQRDLTGRGHQWLEGEAVKAHLTRVEGWVWKNKLFLLSLVMVAWLMVDGLLPR  | 60 | LANVT |
| Q04538   | 1 | SVVIPTHAQKDMVGRGHAWLKGDNIRDHVTRVEGWVWKNKLLTAAIIVALAWLMVDSWMAR | 60 | POWV  |
| P06935   | 1 | SLTVQTHGESTLANKGAWLDSTKATRYLVKTESWILRNPGYALVAAVIGWMLGSNTMQR   | 60 | WNV   |
| P27395   | 1 | SVSVQTHGESSLVNKEAWLDSTKATRYLMKTENWIIRNPGYAFLLAAVIGWMLGSNNQQR  | 60 | JEV   |
| P17763   | 1 | SVALAPHVGLGLETRTETWMSSEGAWKQIQKQVETWALRHPGFTVIALFLAHAIGTSITQK | 60 | DENV1 |
| P29990   | 1 | SVALVPHVGMGLETRTETWMSSEGAWKHVQRIETWILRHPGFTMMAAILAYTIGTTHFQR  | 60 | DENV2 |
| Q6YMS4   | 1 | SVALAPHVGMGLDTRTQTWMSAEGAWRQVEKQVETWALRHPGFTIILFLAHYIGTSLTQK  | 60 | DENV3 |
| Q2YHF0   | 1 | SVALTFHSGMGLETRAETWMSSEGAWKHAQRVESWILRNPGFALLAGFMAYMIGQTGIQR  | 60 | DENV4 |
| P03314   | 1 | AIDLPTHENHGLKTRQEKWMTGRMGERQLQKIERWFRVNPFFAVTALTAYLVGSNMTQR   | 60 | YFV   |
| KJ776791 | 1 | AVTLPSHSTRKLQTRSQTWLESREYTKHLIRVENWIFRNPGFALAAAIAWLLGSSTSQK   | 60 | ZIKV  |

**Supplementary Figure 5. Multiple sequence alignment of flavivirus envelope and membrane proteins.** Sequences were aligned using Clustal Omega. Parts of the alignments are shown in the figure. Histidines that may be involved in the putative pH-dependent conformational switch are highlighted in red. Uniprot IDs are provided on the left side of the sequences (except for ZIKV, where Genbank ID is shown). The position of the amino acids in the aligned sequence and the virus names are shown on the right. TBEVH – Tick-borne encephalitis virus strain Hypr; TBEVV - Tick-borne encephalitis virus European subtype (strain Neudoerfl); TBEVS - Tick-borne encephalitis virus Far Eastern subtype (strain Sofjin); LANVT - Langat virus (strain TP21); POWV - Tick-borne powassan virus (strain LB); WNV - West Nile virus (strain 956); JEV - Japanese encephalitis virus (strain SA-14); DENV1 - Dengue virus type 1 (strain Nauru/West Pac/1974); DENV2 - Dengue virus type 2 (strain Thailand-/16681/1984); DENV3 - Dengue virus type 3 (strain Sri Lanka/1266/2000); DENV4 - Dengue virus type 4 (strain Thailand-/0348/1991); YFV - Yellow fever virus (strain 17D vaccine); ZIKV - Zika virus (strain H/PF/2013). Conservation of a residue is denoted by: “\*” - absolute conservation; “.” - conservation of amino acids with strongly similar properties; “:” - conservation of amino acids with weakly similar properties.



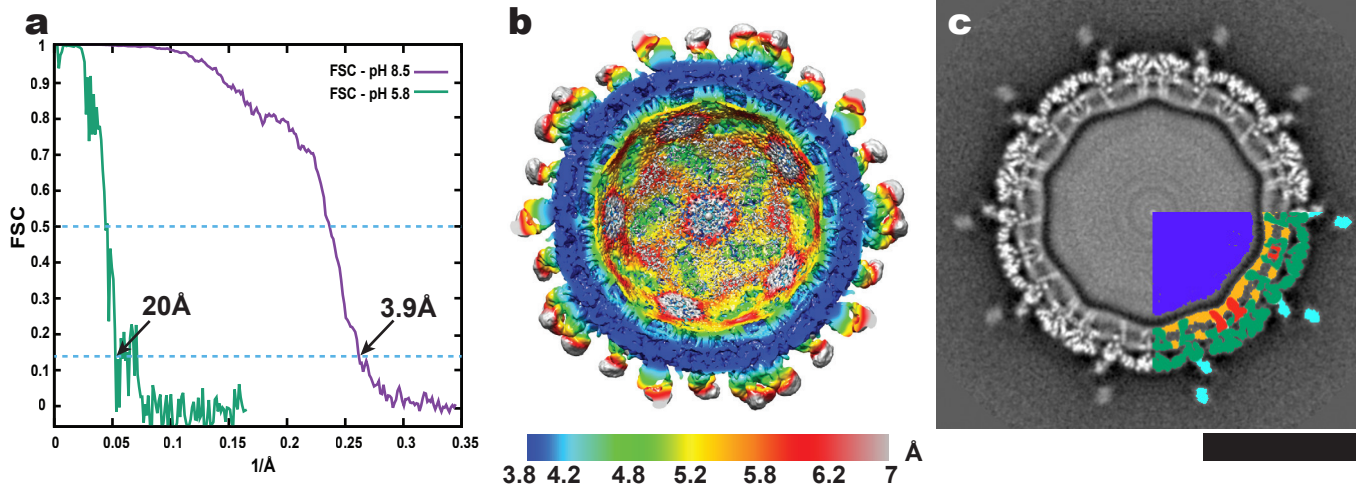

**Supplementary Figure 6. Cryo-EM reconstruction of TBEV Fab 19/1786 complex.** (a) Fourier shell correlation (FSC) curves of final reconstructions of TBEV-Fab 19/1786 complex at pH 8.5 (purple) and at pH 5.8 (green) calculated according to “gold standard”. (b) Local resolution of cryo-EM map of TBEV-Fab 19/1786 complex. The display shows a cut-away half map colored according to the local resolution. Parts of the map with resolution worse than 7 Å are shown in grey. The non-sharpened electron density map was used for the display. (c) Central slice of electron-density map perpendicular to virus fivefold axis. The overall shape and features of the TBEV particle remained intact after attachment of Fab 19/1786 fragment. The lower right quadrant of the slice is color-coded as follows: nucleocapsid – blue; inner and outer membrane leaflets – orange; M-proteins – red; E-proteins – green; Fab 19/1786 attached to virus surface – cyan.

**a****E-protein domain III - Fab 1786 heavy chain interfaces**

| Hydrogen bonds |                |           |                 | Salt bridges |                 |           |                 |
|----------------|----------------|-----------|-----------------|--------------|-----------------|-----------|-----------------|
| ##             | Fab 19/1786 H  | Dist. [Å] | Domain III      | ##           | Fab 19/1786 H   | Dist. [Å] | Domain III      |
| 1              | H:ASN 52[ ND2] | 3.61      | B:MET 306[ O ]  | 1            | H:ASP 104[ OD1] | 3.75      | B:LYS 311[ NZ ] |
| 2              | H:ASN 52[ ND2] | 3.01      | B:CYS 307[ O ]  |              |                 |           |                 |
| 3              | H:TYR 101[ OH] | 3.89      | B:GLU 387[ OE1] |              |                 |           |                 |
| 4              | H:TYR 101[ OH] | 3.74      | B:GLU 387[ OE2] |              |                 |           |                 |
| 5              | H:TYR 101[ O ] | 3.45      | B:THR 310[ OG1] |              |                 |           |                 |
| 6              | H:SER 57[ OG]  | 3.59      | B:ARG 339[ NH2] |              |                 |           |                 |

Interface area: 445 Å<sup>2</sup>

| Fab 19/1786 H |           |        |       |       | Domain III |           |        |       |       |
|---------------|-----------|--------|-------|-------|------------|-----------|--------|-------|-------|
| ##            | Residue   | ASA    | BSA   | ΔG    | ##         | Residue   | ASA    | BSA   | ΔG    |
| 1             | H:SER 31  | 54.91  | 0.85  | -0.01 | 1          | B:THR 303 | 131.99 | 33.27 | 0.19  |
| 2             | H:THR 51  | 8.39   | 0.34  | 0.01  | 2          | B:TYR 304 | 71.20  | 6.25  | 0.10  |
| 3             | H:ASN 52  | 54.84  | 48.93 | -0.08 | 3          | B:THR 305 | 92.83  | 68.16 | 1.00  |
| 4             | H:SER 53  | 40.81  | 24.11 | -0.28 | 4          | B:MET 306 | 108.81 | 49.59 | 0.51  |
| 5             | H:ASP 54  | 97.66  | 11.05 | -0.01 | 5          | B:CYS 307 | 16.98  | 15.25 | -0.12 |
| 6             | H:ASP 56  | 98.04  | 30.36 | -0.02 | 6          | B:ASP 308 | 49.25  | 45.23 | 0.11  |
| 7             | H:SER 57  | 75.49  | 51.06 | 0.32  | 7          | B:LYS 309 | 109.03 | 63.74 | 0.91  |
| 8             | H:THR 58  | 73.76  | 8.60  | -0.03 | 8          | B:THR 310 | 84.83  | 48.08 | 0.37  |
| 9             | H:TYR 59  | 124.73 | 38.32 | 0.59  | 9          | B:LYS 311 | 96.52  | 46.06 | 0.44  |
| 10            | H:LYS 65  | 134.04 | 26.65 | -0.37 | 10         | B:THR 335 | 103.30 | 43.76 | 0.58  |
| 11            | H:TYR 101 | 166.52 | 41.56 | 0.06  | 11         | B:ARG 339 | 84.66  | 13.17 | -0.15 |
| 12            | H:ASP 102 | 106.40 | 43.33 | -0.05 | 12         | B:GLU 387 | 125.79 | 30.68 | -0.35 |
| 13            | H:TYR 103 | 93.11  | 69.01 | 0.73  |            |           |        |       |       |
| 14            | H:ASP 104 | 77.12  | 20.33 | -0.10 |            |           |        |       |       |
| 15            | H:GLY 105 | 48.45  | 13.35 | 0.20  |            |           |        |       |       |

**E-protein domain III - Fab 1786 light chain interfaces**

| Hydrogen bonds |                |           |                 |
|----------------|----------------|-----------|-----------------|
| ##             | Fab 19/1786 L  | Dist. [Å] | Domain III      |
| 1              | L:ASN 32[ ND2] | 2.92      | B:SER 333[ O ]  |
| 2              | L:ASN 32[ ND2] | 3.75      | B:GLY 334[ O ]  |
| 3              | L:HIS 94[ N ]  | 3.25      | B:LYS 336[ O ]  |
| 4              | L:HIS 94[ ND1] | 3.48      | B:PRO 337[ O ]  |
| 5              | L:ASN 92[ O ]  | 2.69      | B:LYS 336[ N ]  |
| 6              | L:ASN 32[ OD1] | 3.68      | B:LYS 336[ NZ ] |

Interface area: 300 Å<sup>2</sup>

| Fab 19/1786 L |          |        |       |       | Domain III |           |        |       |       |
|---------------|----------|--------|-------|-------|------------|-----------|--------|-------|-------|
| ##            | Residue  | ASA    | BSA   | ΔG    | ##         | Residue   | ASA    | BSA   | ΔG    |
| 1             | L:ILE 2  | 5.34   | 1.01  | 0.02  | 1          | B:TYR 304 | 71.20  | 4.36  | 0.07  |
| 2             | L:GLN 27 | 107.63 | 22.99 | -0.26 | 2          | B:THR 305 | 92.83  | 15.67 | -0.13 |
| 3             | L:ASN 28 | 120.25 | 0.25  | -0.00 | 3          | B:LYS 311 | 96.52  | 30.16 | -0.42 |
| 4             | L:THR 31 | 81.87  | 13.01 | -0.15 | 4          | B:SER 333 | 77.16  | 30.67 | -0.04 |
| 5             | L:ASN 32 | 34.04  | 29.66 | -0.37 | 5          | B:GLY 334 | 21.89  | 21.89 | 0.04  |
| 6             | L:TYR 49 | 112.43 | 3.26  | 0.05  | 6          | B:THR 335 | 103.30 | 61.54 | 0.91  |
| 7             | L:SER 50 | 28.13  | 5.76  | -0.07 | 7          | B:LYS 336 | 73.52  | 52.74 | -0.47 |
| 8             | L:TYR 91 | 80.21  | 47.86 | 0.27  | 8          | B:PRO 337 | 29.55  | 20.44 | 0.06  |
| 9             | L:ASN 92 | 69.40  | 61.69 | -0.66 | 9          | B:CYS 338 | 2.44   | 2.26  | 0.04  |
| 10            | L:ASN 93 | 43.50  | 22.49 | -0.09 | 10         | B:ASN 366 | 119.82 | 53.72 | -0.11 |
| 11            | L:HIS 94 | 163.14 | 91.29 | 0.05  |            |           |        |       |       |
| 12            | L:LEU 96 | 79.29  | 13.82 | 0.22  |            |           |        |       |       |

**E-protein domain I - Fab 1786 heavy chain interfaces**

| Hydrogen bonds |                 |           |                | Salt bridges |                |           |                |
|----------------|-----------------|-----------|----------------|--------------|----------------|-----------|----------------|
| ##             | Domain I        | Dist. [Å] | Fab 19/1786 H  | ##           | Domain I       | Dist. [Å] | Fab 19/1786 H  |
| 1              | B:LYS 161[ NZ ] | 3.86      | H:GLY 66[ O ]  | 1            | B:GLU 51[ OE1] | 2.97      | H:ARG 74[ NE ] |
| 2              | B:GLU 51[ OE1]  | 2.97      | H:ARG 74[ NE ] |              |                |           |                |
| 3              | B:THR 156[ OG1] | 3.77      | H:GLN 82[ NE2] |              |                |           |                |

Interface area: 300 Å<sup>2</sup>

| Fab 19/1786 H |           |        |       |       | Domain I |          |        |       |       |
|---------------|-----------|--------|-------|-------|----------|----------|--------|-------|-------|
| ##            | Residue   | ASA    | BSA   | ΔG    | ##       | Residue  | ASA    | BSA   | ΔG    |
| 1             | B:GLU 51  | 93.32  | 58.79 | -0.49 | 1        | H:GLY 15 | 56.50  | 7.44  | 0.03  |
| 2             | B:ASN 52  | 80.76  | 14.14 | -0.06 | 2        | H:GLY 66 | 73.45  | 24.48 | -0.04 |
| 3             | B:LYS 136 | 113.50 | 0.70  | -0.02 | 3        | H:ARG 67 | 61.35  | 7.50  | -0.07 |
| 4             | B:THR 156 | 114.48 | 26.21 | -0.06 | 4        | H:PHE 68 | 10.83  | 4.79  | -0.05 |
| 5             | B:SER 158 | 115.29 | 43.90 | 0.32  | 5        | H:THR 69 | 74.43  | 22.77 | -0.13 |
| 6             | B:ARG 160 | 49.39  | 4.42  | -0.05 | 6        | H:ASP 73 | 48.92  | 28.39 | -0.27 |
| 7             | B:LYS 161 | 76.90  | 37.79 | -1.09 | 7        | H:ARG 74 | 147.42 | 64.68 | -0.53 |
| 8             | B:THR 162 | 60.72  | 1.29  | 0.00  | 8        | H:ALA 75 | 82.66  | 37.18 | 0.57  |
| 9             | B:GLY 177 | 47.56  | 6.69  | 0.11  | 9        | H:LYS 76 | 149.25 | 30.64 | 0.46  |
| 10            | B:GLU 277 | 110.47 | 18.69 | -0.12 | 10       | H:GLN 82 | 76.49  | 25.05 | -0.08 |
| 11            | B:GLY 278 | 45.53  | 3.35  | 0.05  | 11       | H:SER 84 | 43.78  | 29.69 | 0.20  |
| 12            | B:THR 279 | 72.04  | 60.83 | 0.80  | 12       | H:SER 85 | 59.67  | 12.31 | 0.07  |
| 13            | B:LYS 280 | 60.86  | 11.88 | 0.19  |          |          |        |       |       |
| 14            | B:ASN 367 | 150.92 | 20.75 | -0.24 |          |          |        |       |       |

**b**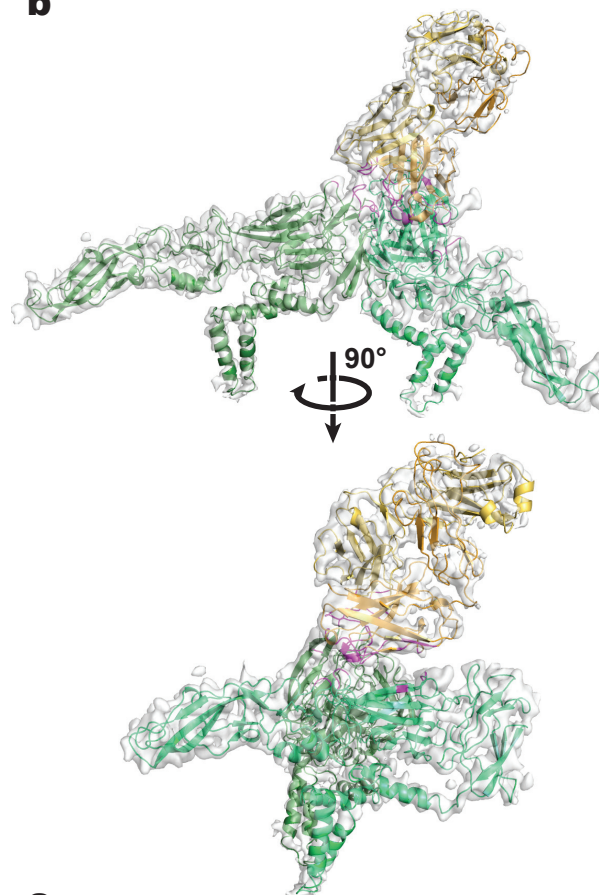**c**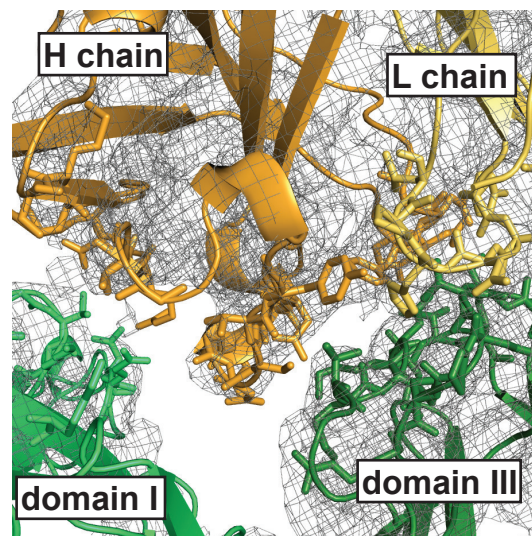

**Supplementary Figure 7. E-protein – Fab 19/1786 interaction interfaces next to threefold axis.** Interfacing amino acids were identified using PDBePISA. (a) Tables show hydrogen bonds, salt bridges, and amino acids with buried surface. (b) Cartoon representation of E-protein – Fab 19/1786 interfaces shown in tables. E-proteins are shown in green, Fab 19/1786 heavy chain in orange, Fab 19/1786 light chain in yellow, and residues forming the interface in magenta. (c) Detail of interaction interface.

## a E-protein domain III - Fab 1786 heavy chain interfaces

| Hydrogen bonds |                  |           |                   | Salt bridges |                   |           |                  |
|----------------|------------------|-----------|-------------------|--------------|-------------------|-----------|------------------|
| ##             | Fab 19/1786 H    | Dist. [Å] | Domain III        | ##           | Fab 19/1786 H     | Dist. [Å] | Domain III       |
| 1              | H:SER 53 [ OG ]  | 3.58      | C:LYS 309 [ NZ ]  | 1            | H:ASP 56 [ OD2 ]  | 2.82      | C:LYS 309 [ NZ ] |
| 2              | H:ASP 56 [ OD2 ] | 2.82      | C:LYS 309 [ NZ ]  | 2            | H:ASP 104 [ OD1 ] | 3.90      | C:LYS 311 [ NZ ] |
| 3              | H:SER 53 [ O ]   | 2.90      | C:LYS 309 [ NZ ]  |              |                   |           |                  |
| 4              | H:TYR 101 [ O ]  | 3.87      | C:THR 310 [ OG1 ] |              |                   |           |                  |
| 5              | H:SER 57 [ OG ]  | 3.84      | C:ARG 339 [ NH2 ] |              |                   |           |                  |

Interface area: 440 Å<sup>2</sup>

**Interfacing residues**

Legend: Inaccessible residues (blue), Solvent-accessible residues (light blue), ASA Accessible Surface Area, Å<sup>2</sup>, BSA Buried Surface Area, Å<sup>2</sup>, ΔG Solvation energy effect, kcal/mol, ||| Buried area percentage, one bar per 10%

| ## | Fab 19/1786 H | HSDC | ASA    | BSA   | ΔG    | ## | Domain III | HSDC | ASA    | BSA   | ΔG    |
|----|---------------|------|--------|-------|-------|----|------------|------|--------|-------|-------|
| 1  | H:SER 30      |      | 57.11  | 5.75  | -0.07 | 1  | C:THR 303  |      | 128.43 | 12.34 | 0.17  |
| 2  | H:SER 31      |      | 52.54  | 9.86  | 0.12  | 2  | C:TYR 304  |      | 75.44  | 2.02  | -0.00 |
| 3  | H:ASN 52      |      | 53.02  | 45.59 | 0.04  | 3  | C:THR 305  |      | 87.47  | 58.32 | 0.93  |
| 4  | H:SER 53      |      | 48.62  | 34.92 | -0.34 | 4  | C:MET 306  |      | 95.61  | 48.76 | 0.44  |
| 5  | H:ASP 54      |      | 66.83  | 3.82  | 0.06  | 5  | C:CYS 307  |      | 16.54  | 16.18 | -0.11 |
| 6  | H:ASP 56      |      | 117.62 | 22.50 | -0.10 | 6  | C:ASP 308  |      | 50.24  | 44.08 | 0.14  |
| 7  | H:SER 57      |      | 73.05  | 51.64 | 0.27  | 7  | C:LYS 309  |      | 107.40 | 76.31 | -1.23 |
| 8  | H:THR 58      |      | 77.33  | 11.91 | -0.14 | 8  | C:THR 310  |      | 85.27  | 45.35 | 0.40  |
| 9  | H:TYR 59      |      | 108.26 | 26.33 | 0.42  | 9  | C:LYS 311  |      | 100.62 | 44.28 | 0.31  |
| 10 | H:LYS 65      |      | 125.17 | 12.99 | -0.41 | 10 | C:PHE 332  |      | 8.09   | 0.31  | 0.00  |
| 11 | H:TYR 101     |      | 167.57 | 35.60 | 0.10  | 11 | C:GLY 334  |      | 28.90  | 9.08  | 0.15  |
| 12 | H:ASP 102     |      | 101.93 | 43.78 | -0.01 | 12 | C:THR 335  |      | 105.67 | 49.87 | 0.55  |
| 13 | H:TYR 103     |      | 102.14 | 78.44 | 0.84  | 13 | C:ARG 339  |      | 79.45  | 10.42 | -0.12 |
| 14 | H:ASP 104     |      | 85.25  | 25.17 | -0.14 | 14 | C:GLU 387  |      | 129.87 | 34.18 | -0.44 |
| 15 | H:GLY 105     |      | 49.72  | 15.63 | 0.24  |    |            |      |        |       |       |

## E-protein domain III - Fab 1786 light chain interfaces

| Hydrogen bonds |                  |           |                   |
|----------------|------------------|-----------|-------------------|
| ##             | Fab 19/1786 L    | Dist. [Å] | Domain III        |
| 1              | L:ASN 32 [ ND2 ] | 2.81      | C:SER 333 [ O ]   |
| 2              | L:ASN 32 [ ND2 ] | 3.56      | C:GLY 334 [ O ]   |
| 3              | L:HIS 94 [ N ]   | 3.53      | C:LYS 336 [ O ]   |
| 4              | L:HIS 94 [ ND1 ] | 3.09      | C:LYS 336 [ O ]   |
| 5              | L:HIS 94 [ ND1 ] | 3.76      | C:PRO 337 [ O ]   |
| 6              | L:TYR 91 [ O ]   | 3.85      | C:LYS 336 [ N ]   |
| 7              | L:ASN 32 [ OD1 ] | 3.54      | C:LYS 336 [ NZ ]  |
| 8              | L:ASN 92 [ O ]   | 3.68      | C:ASN 366 [ ND2 ] |

Interface area: 275 Å<sup>2</sup>

**Interfacing residues**

Legend: Inaccessible residues (blue), Solvent-accessible residues (light blue), ASA Accessible Surface Area, Å<sup>2</sup>, BSA Buried Surface Area, Å<sup>2</sup>, ΔG Solvation energy effect, kcal/mol, ||| Buried area percentage, one bar per 10%

| ## | Fab 19/1786 L | HSDC | ASA    | BSA   | ΔG    | ## | Domain III | HSDC | ASA    | BSA   | ΔG    |
|----|---------------|------|--------|-------|-------|----|------------|------|--------|-------|-------|
| 1  | L:ILE 2       |      | 5.45   | 0.65  | 0.01  | 1  | C:THR 305  |      | 87.47  | 24.87 | 0.28  |
| 2  | L:GLN 27      |      | 103.52 | 10.03 | -0.11 | 2  | C:LYS 311  |      | 100.62 | 1.66  | -0.01 |
| 3  | L:THR 31      |      | 87.81  | 5.16  | -0.06 | 3  | C:SER 333  |      | 73.07  | 24.86 | -0.12 |
| 4  | L:ASN 32      |      | 41.31  | 35.50 | -0.44 | 4  | C:GLY 334  |      | 28.90  | 19.82 | 0.06  |
| 5  | L:SER 50      |      | 33.75  | 0.86  | -0.01 | 5  | C:THR 335  |      | 105.67 | 55.80 | 0.83  |
| 6  | L:TYR 91      |      | 75.48  | 44.15 | 0.24  | 6  | C:LYS 336  |      | 88.19  | 64.80 | -0.20 |
| 7  | L:ASN 92      |      | 78.83  | 64.26 | -0.57 | 7  | C:PRO 337  |      | 38.77  | 28.00 | 0.24  |
| 8  | L:ASN 93      |      | 52.04  | 24.09 | -0.08 | 8  | C:CYS 338  |      | 0.16   | 0.16  | 0.00  |
| 9  | L:HIS 94      |      | 157.42 | 91.55 | 0.11  | 9  | C:ASN 366  |      | 115.96 | 40.10 | -0.22 |
| 10 | L:LEU 96      |      | 89.25  | 14.87 | 0.24  |    |            |      |        |       |       |

## E-protein domain II - Fab 1786 heavy chain interfaces

| Hydrogen bonds |                 |           |                  |
|----------------|-----------------|-----------|------------------|
| ##             | Domain II       | Dist. [Å] | Fab 19/1786 H    |
| 1              | B:LYS 64 [ NZ ] | 2.09      | H:GLY 55 [ O ]   |
| 2              | B:LYS 69 [ NZ ] | 3.04      | H:ASP 54 [ O ]   |
| 3              | B:GLU 84 [ N ]  | 3.30      | H:ASP 56 [ OD1 ] |
| 4              | B:VAL 70 [ O ]  | 3.40      | H:ARG 74 [ NH2 ] |

Interface area: 365 Å<sup>2</sup>

**Interfacing residues**

Legend: Inaccessible residues (blue), Solvent-accessible residues (light blue), ASA Accessible Surface Area, Å<sup>2</sup>, BSA Buried Surface Area, Å<sup>2</sup>, ΔG Solvation energy effect, kcal/mol, ||| Buried area percentage, one bar per 10%

| ## | Domain II | HSDC | ASA    | BSA   | ΔG    | ## | Fab 19/1786 H | HSDC | ASA    | BSA    | ΔG    |
|----|-----------|------|--------|-------|-------|----|---------------|------|--------|--------|-------|
| 1  | B:LYS 64  |      | 97.54  | 1.97  | -0.07 | 1  | H:SER 53      |      | 48.62  | 0.12   | -0.00 |
| 2  | B:SER 66  |      | 44.45  | 10.21 | 0.16  | 2  | H:ASP 54      |      | 66.83  | 41.46  | -0.38 |
| 3  | B:ASP 67  |      | 80.90  | 64.57 | -0.64 | 3  | H:GLY 55      |      | 35.40  | 27.59  | -0.28 |
| 4  | B:LYS 69  |      | 102.89 | 77.40 | -0.71 | 4  | H:ASP 56      |      | 117.62 | 103.65 | -0.47 |
| 5  | B:VAL 70  |      | 43.91  | 9.44  | -0.08 | 5  | H:SER 57      |      | 73.05  | 16.53  | 0.25  |
| 6  | B:ALA 71  |      | 15.69  | 14.23 | 0.23  | 6  | H:THR 58      |      | 77.33  | 20.00  | 0.30  |
| 7  | B:ALA 72  |      | 25.67  | 4.02  | -0.05 | 7  | H:GLY 66      |      | 65.11  | 1.84   | -0.02 |
| 8  | B:ARG 73  |      | 102.46 | 6.97  | -0.15 | 8  | H:THR 69      |      | 80.04  | 14.57  | 0.23  |
| 9  | B:ALA 80  |      | 8.03   | 0.67  | 0.01  | 9  | H:ILE 70      |      | 10.93  | 7.37   | -0.08 |
| 10 | B:THR 81  |      | 125.01 | 1.35  | -0.02 | 10 | H:SER 71      |      | 57.12  | 21.43  | 0.34  |
| 11 | B:LEU 82  |      | 29.64  | 21.59 | 0.35  | 11 | H:ARG 72      |      | 35.51  | 24.51  | -0.06 |
| 12 | B:ALA 83  |      | 79.73  | 41.44 | 0.55  | 12 | H:ASP 73      |      | 38.34  | 0.37   | -0.00 |
| 13 | B:GLU 84  |      | 29.92  | 28.13 | -0.09 | 13 | H:ARG 74      |      | 158.46 | 74.33  | -1.19 |
| 14 | B:GLN 87  |      | 96.17  | 39.08 | -0.40 | 14 | H:ALA 75      |      | 87.91  | 8.02   | 0.13  |
| 15 | B:LYS 118 |      | 68.84  | 22.04 | 0.32  | 15 | H:LYS 76      |      | 141.42 | 7.69   | 0.12  |
| 16 | B:LYS 251 |      | 126.74 | 15.88 | -0.07 |    |               |      |        |        |       |

b

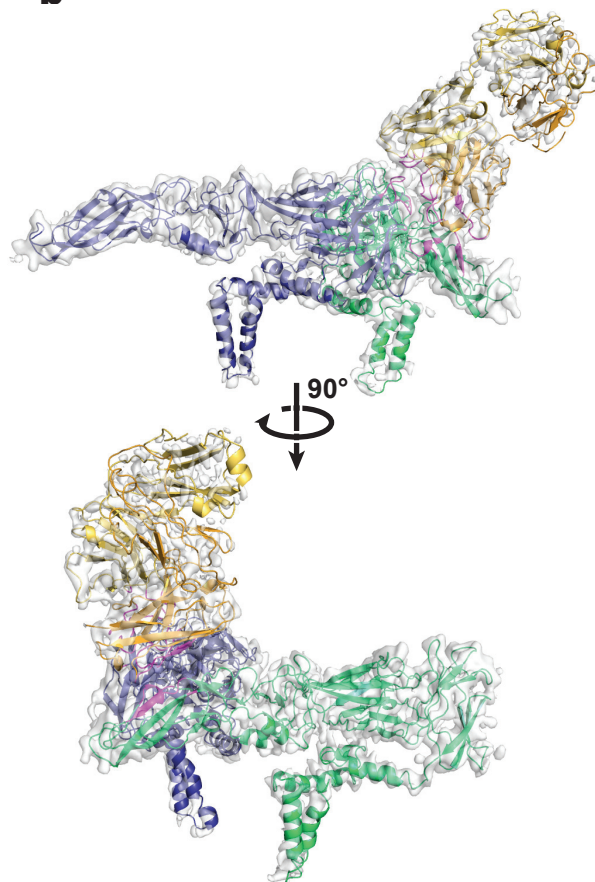

c

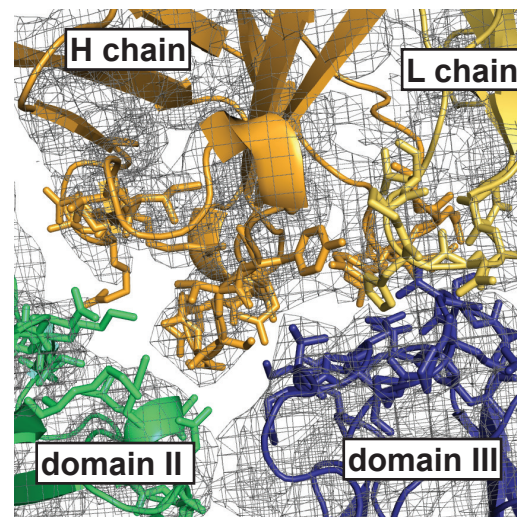

**Supplementary Figure 8. E-protein – Fab 19/1786 interaction interfaces close to fivefold axis.** Interfacing amino acid residues were identified using PDBePISA. (a) Tables show hydrogen bonds, salt bridges, and amino acids with buried surface. (b) Cartoon representation of E-protein – Fab 19/1786 interfaces show in tables. E-proteins are shown in green and blue, Fab 19/1786 heavy chain in orange, Fab 19/1786 light chain in yellow, and residues forming the interface in magenta. (c) Detail of interaction interface.

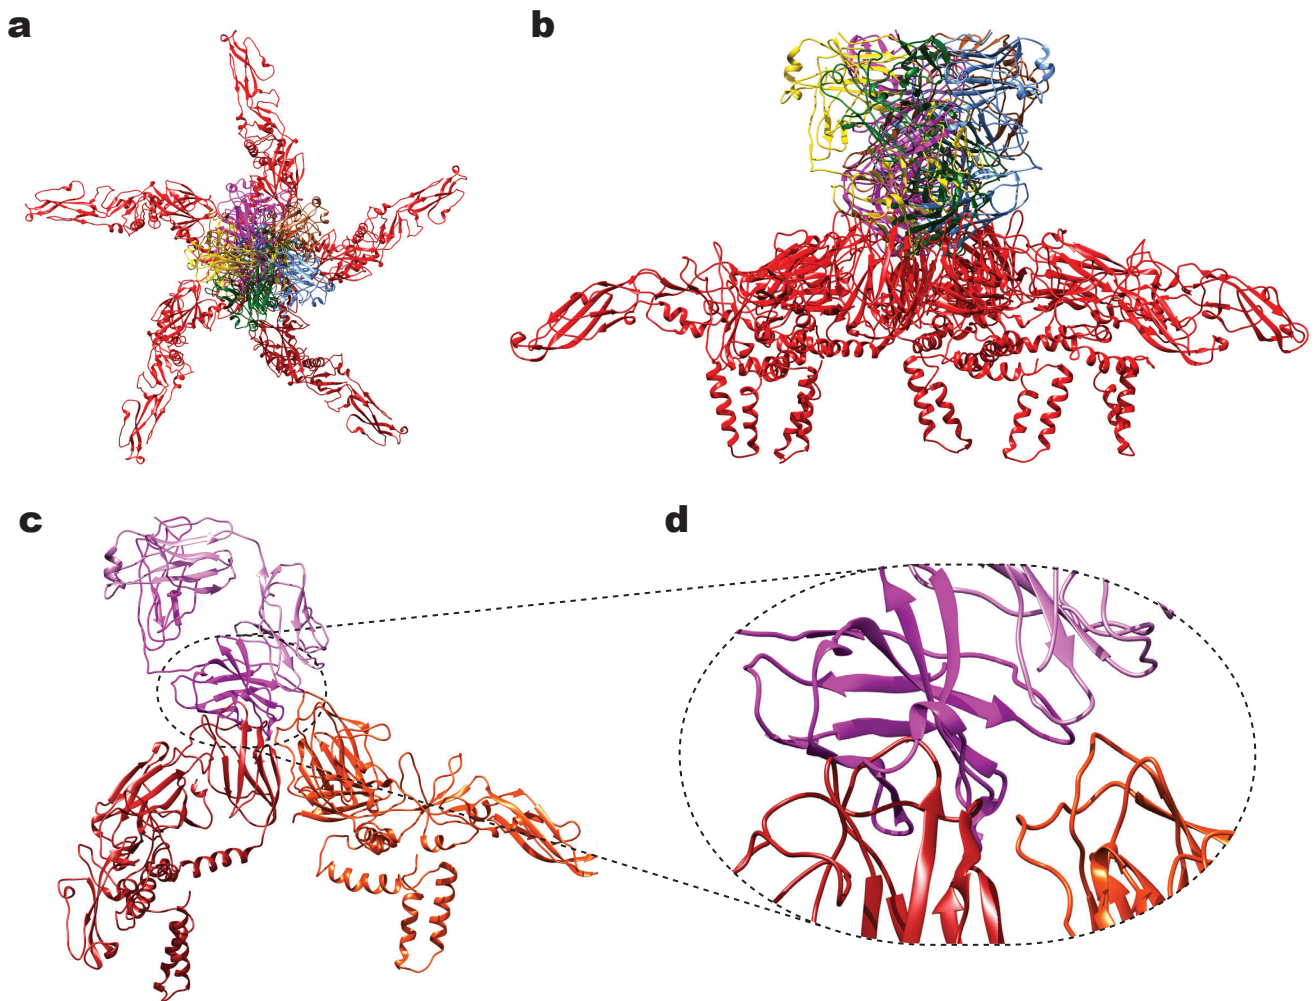

**Supplementary Figure 9. Steric hindrance prevents attachment of Fab 19/1786 fragments to unoccupied E-proteins.** Molecular model shows clashes of Fab fragments with each other caused by simulated attachment of Fab 19/1786 to unoccupied E-proteins close to fivefold axis (a, b). The Fab 19/1786 could not bind to the third E-protein within the icosahedral asymmetric unit because upon binding to domain III of the unoccupied E-protein, the heavy chain of the Fab would clash with domain III of a neighboring E-protein (c) and (d). E-proteins are shown in red; Fab 19/1786 fragments in multiple colors.

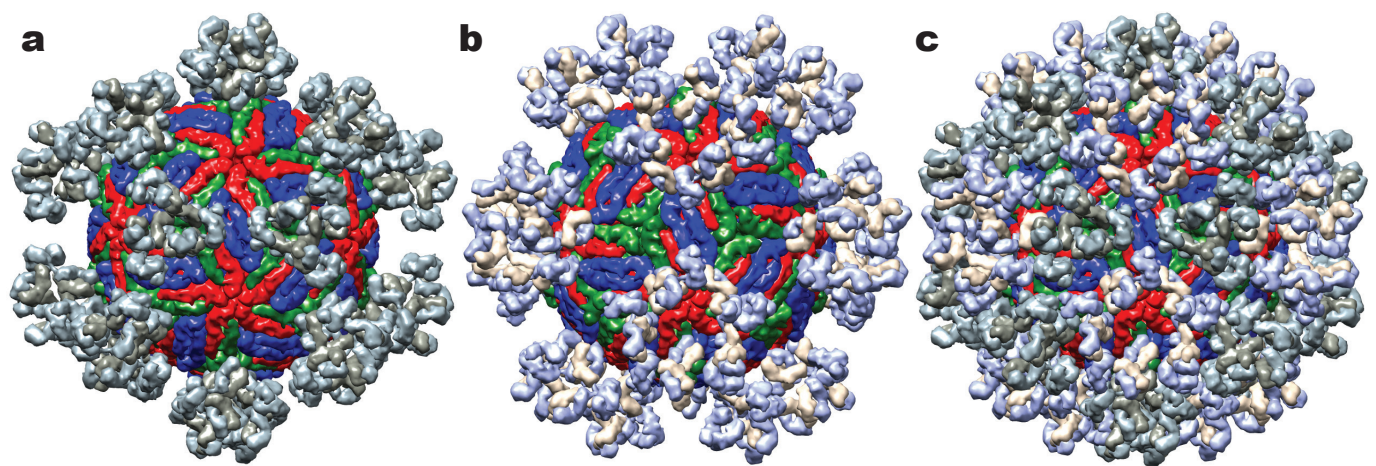

**Supplementary Figure 10. TBEV particle fully occupied by mouse IgG1 antibodies.** Model of TBEV virion covered with IgG1 antibodies on sites corresponding to epitopes of Fab 19/1786. PDB:1IGY was superposed onto Fab 19/1786 attached to virion surface next to virus threefold axis (a), close to virus fivefold axis (b), and on both interaction sites (c). The attachment produces clash-free coverage of the particle with IgG1.
